# Supplementary material
Source: PubMed Central journal article supplement (PMC6763999)
Supplement: jama-322-1178-s001.pdf [file jama-322-1178-s001.pdf]

## Supplementary Online Content

Shan Z, Rehm CD, Rogers G, et al. Trends in dietary carbohydrate, protein, and fat intake and diet quality among US adults, 1999-2016. *JAMA*. doi:10.1001/jama.2019.13771

### **eAppendix.** Supplemental Methods

**eTable 1.** Dietary Components Classified as Food Sources of Carbohydrate and Protein

**eTable 2.** Healthy Eating Index-2015 Components, Component Points, and Standards for Scoring

**eTable 3.** Trends in Estimated Percent Energy (%E) and Absolute Intake (g/d) of Total and Subtypes of Macronutrients Among US Adults  $\geq 20$  Years by NHANES Survey Cycle, 1999-2016

**eTable 4.** Trends in Estimated Percent Energy (%E) and Absolute Intake (g/d) of Total and Subtypes of Macronutrients Among US Adults  $\geq 20$  Years by NHANES Survey Cycle, 2003-2016

**eTable 5.** Trends in Estimated Percent Energy (%E) and Absolute Intake (g/d) of Total and Subtypes of Macronutrients, After Adjustment for Age, Sex, Race/Ethnicity, Education, and Income Among US Adults  $\geq 20$  Years by NHANES Survey Cycle, 1999-2016

**eTable 6.** Trends in Estimated Absolute Intake of Carbohydrate and Protein From Different Sources (g/d) Among Adults  $\geq 20$  Years by NHANES Survey Cycle, 1999-2016

**eTable 7.** Trends in Estimated Percent Energy (%E) From High- and Low-Quality Carbohydrate by Age Group, Sex, Race/Ethnicity, Education, and Income, 1999-2016

**eTable 8.** Trends in Estimated Percent Energy (%E) From Animal and Plant Protein by Age Group, Sex, Race/Ethnicity, Education, and Income, 1999-2016

**eTable 9.** Trends in Estimated Percent Energy (%E) From Saturated Fatty Acids, Monounsaturated Fatty Acids, and Polyunsaturated Fatty Acids by Age Group, Sex, Race/Ethnicity, Education, and Income, 1999-2016

**eTable 10.** Trends in Estimated Healthy Eating Index-2015 by Age Group, Sex, Race/Ethnicity, Education, and Income, 1999-2016

### **eReferences**

This supplementary material has been provided by the authors to give readers additional information about their work.

## **eAppendix. Supplemental Methods**

### **Estimating carbohydrate and protein food sources**

Food sources of carbohydrates and protein were not pre-coded in the National Health and Nutrition Examination Survey (NHANES) data. Therefore, we estimated the sources of carbohydrates and protein involved a multi-step process, using methods previously developed to estimate protein sources in NHANES.<sup>1</sup> First, the United States Department of Agriculture (USDA) Food and Nutrient Database for Dietary Studies (FNDDS)-USDA National Nutrient Database for Standard Reference (SR) link file, which includes a break-down of ingredients for foods consumed by NHANES participants, was used to identify the carbohydrate or protein source based on a pre-determined algorithm (eTable 1). One team member (Z.S.) manually assigned the carbohydrate or protein source to each ingredient, and a second team member (C.D.R.) reviewed the coding. Any discrepancies were resolved by consensus. When the ingredients could be assigned to a specific source, the amount of protein or carbohydrate from each source was summed for each participant. These foods underwent no additional manipulation. For example, a ‘Cobb salad’ has 7 ingredients in the database: lettuce, watercress, avocados, tomato, chicken breast, bacon, and egg (dressing is coded separately). For the coding for protein source, the first four will be coded as “other”, the chicken breast as “poultry”, the bacon as “processed meat”, and the egg as “egg”.

For foods that contained ingredients that could not be assigned to a specific source, we flagged these foods as being “mixed” that require additional manipulation. Some examples of these mixed foods include ice cream sandwiches, several types of soups, and mixed dishes that could not be disaggregated as other foods such as fried rice or pizza. To avoid having a large “other or mixed” category, the MyPyramid Equivalents Database (MPED) and the Food Patterns Equivalents Database (FPED)<sup>2,3</sup> that report nutrient values for 32-37 food groups were used to estimate the protein/carbohydrate sources for those mixed foods. A prediction equation was developed to estimate the amount of protein and carbohydrate per MPED/FPED unit among non-mixed foods that only contained that MPED/FPED food group (e.g., per ounce equivalent of red meat or cup equivalent of milk). In this sense, information was borrowed from the non-mixed foods to inform the estimation of protein/carbohydrate for mixed foods. For each prediction equation, the predictive performance was evaluated by calculating a correlation coefficient between the modeled and actual value. All correlation coefficients between the modeled and actual values for protein/carbohydrate were  $\geq 0.88$ . For example, we estimated that each ounce-equivalent of poultry included 8.31 grams of protein and the correlation coefficient for that MPED/FPED food group was  $>0.99$ . The modeled protein/carbohydrate values by MPED/FPED food group were then converted to a proportion of total modeled protein/carbohydrate in that food, after completing the assessment for each MPED/FPED food group. The modeled values were then applied to the total protein/carbohydrate amount in each specific food to estimate the final amount of protein/carbohydrate by source. At the end, the amount of protein/carbohydrate from each source in all foods were summed for each participant.

### **Methods of estimating usual intake of foods and nutrients**

Intake of nutrients and foods among NHANES participants were assessed using 24-hour dietary recalls conducted by trained interviewers. From 1999 to 2002, one 24-hour dietary recall was conducted in-person in the NHANES Mobile Examination Center. From 2003 onwards, a second 24-hour recall was administered by a telephone interview approximately 3-10 days after the first recall. The 4-step Multiple-Pass Method was used in 1999-2001 and the new 5-step Automated Multiple-Pass Method was introduced from 2002, both of which are well-validated research-based multiple-pass approaches to enhance complete and accurate food recall and reduce respondent burden.<sup>4</sup> All foods and beverages reported in dietary recalls were coded, and their nutrient values were determined using the USDA FNDDS. Dietary data from one or two 24-hour dietary recalls may not represent a person's usual intake because of substantial within-person variability due to day-to-day variations in food intake. Therefore, we applied the National Cancer Institute (NCI) method to estimate usual intake of foods and nutrients. As documented in prior literature, the NCI method is the preferred method for estimating usual intake from 24-hour dietary recalls.<sup>5</sup> The NCI method requires that a subset of the individuals have multiple dietary data to estimate and separate within- and between-person variation. In our study, more than 70% of the included NHANES respondents provided two dietary recalls. We combined data from all cycles to apply the NCI method.

© 2019 American Medical Association. All rights reserved.

A two-step approach was used to estimate usual intake in the NCI method. The first step modeled the probability of consuming a given food or nutrient and the amount for foods or nutrients that are not consumed daily by most persons. If more than 5% of the participants reported zero intake of a food/nutrient, this food/nutrient was considered as episodically consumed (such as dairy products and protein from dairy products); otherwise the food/nutrient was considered as daily consumed (such as refined grain and carbohydrate from refined grain). For foods/nutrients were consumed daily, the amount-only model was used in the first step (MIXTRAN SAS macro). For foods/nutrients were consumed episodically, we used a 2-part model that estimated the probability of consumption and the amount.

The second step of the NCI method involved estimating usual intake with parameters estimated from the first step using mixed-effect linear regression on a transformed scale with a person-specific effect (INDIVINT SAS macro). For each nutrient, the following covariates were specified for estimation of usual intake: an indicator of first- versus second-day dietary recall, day of the week when recall occurred (weekday *versus* weekend), age group (20 to 34, 35 to 49, 50 to 64, and  $\geq 65$  years), sex, and race/ethnicity (non-Hispanic white, non-Hispanic black, Hispanic, and other).

**eTable 1. Dietary Components Classified as Food Sources of Carbohydrate And Protein**

| Food groups                | Subcategory                                | Items                                                                                                                                                                                                                                                                    |
|----------------------------|--------------------------------------------|--------------------------------------------------------------------------------------------------------------------------------------------------------------------------------------------------------------------------------------------------------------------------|
| Animal protein             | Seafood                                    | Canned tuna; dark meat fish e.g. mackerel, salmon, sardines, bluefish, swordfish; other fish e.g. cod, haddock, halibut; shrimp, lobster, scallops as a main dish; breaded fish cakes, pieces or fish sticks                                                             |
|                            | Unprocessed red meat                       | Beef, lamb or pork as a main dish e.g. steak, roast, ham, etc.; beef, lamb or pork as a mixed dish e.g. sandwich, stew, casserole, lasagna, etc.; hamburger; lean hamburger; regular hamburger                                                                           |
|                            | Processed meat                             | Bacon; hotdogs; beef hotdogs; chicken or turkey hotdogs; salami, bologna, or other processed sandwich meats; other processed meats e.g. sausage, kielbasa, etc.                                                                                                          |
|                            | Poultry                                    | Chicken or turkey with skin; chicken or turkey without skin; chicken or turkey sandwich, chicken wings, chicken legs                                                                                                                                                     |
|                            | Egg                                        | Eggs; egg whites or egg beaters; omega-3 fortified eggs; mayonnaise                                                                                                                                                                                                      |
|                            | Dairy                                      | Skim milk; 1% or 2% milk; whole milk; cream cheese; sour cream; cream e.g. coffee or whipped; cottage or ricotta cheese; other cheese e.g. American, cheddar, etc.; yogurt; flavored yogurt without artificial sweetener; plain or artificially sweetened yogurt; butter |
|                            | Residual animal protein from other sources | All other animal protein not in the 7 specific groups above                                                                                                                                                                                                              |
| Plant protein              | Whole grain                                | Whole-wheat flour, bulgur (cracked wheat), whole barley, whole-barley flour, oatmeal, oats, rye, whole cornmeal, popcorn, wild rice, brown rice, etc.                                                                                                                    |
|                            | Refined grain                              | White flour, de-germed cornmeal, white bread, white rice, etc.                                                                                                                                                                                                           |
|                            | Nuts                                       | Peanut butter; peanuts; walnuts and other nuts                                                                                                                                                                                                                           |
|                            | Legumes                                    | Tofu or other soy protein; peas or lima beans; beans or lentils                                                                                                                                                                                                          |
|                            | Residual plant protein from other sources  | All other plant protein not in the 4 specific groups above                                                                                                                                                                                                               |
| High-quality carbohydrates | Whole grain                                | As above                                                                                                                                                                                                                                                                 |
|                            | Fruits                                     | Any fresh, canned, frozen or dried fruits                                                                                                                                                                                                                                |
|                            | Legumes                                    | As above                                                                                                                                                                                                                                                                 |
|                            | Non-starchy vegetables                     | Salad greens, cooking greens, summer squash, broccoli, cucumber, peppers, onions, tomatoes, asparagus, carrots, sweet potatoes, pumpkin and winter squash, etc.                                                                                                          |
| Low-quality carbohydrates  | Refined grain                              | As above                                                                                                                                                                                                                                                                 |

| <b>Food groups</b> | <b>Subcategory</b>                     | <b>Items</b>                                                                                                                                  |
|--------------------|----------------------------------------|-----------------------------------------------------------------------------------------------------------------------------------------------|
|                    | Potato                                 | Potatoes                                                                                                                                      |
|                    | Starchy vegetables other than potatoes | Immature breadfruit, burdock, cassava, corn (raw), dasheen, green bananas, hominy, parsnips, immature peas, plantains, salsify, tannier, etc. |
|                    | Added sugars                           | Sugar, candy, sugar-sweetened beverages, fruit snacks, brownie                                                                                |
|                    | 100% fruit juices                      | 100% orange juice, apple juice, mixed fruit juice, etc.                                                                                       |
|                    | Residual carbohydrates                 | All other carbohydrate not included in the groups above (e.g. dairy foods)                                                                    |

**eTable 2. Healthy Eating Index-2015 Components, Component Points, and Standards for Scoring**

| Component                  | Maximum |                                |                                            |
|----------------------------|---------|--------------------------------|--------------------------------------------|
|                            | points  | Standard for maximum score     | Standard for minimum score of zero         |
| <b>Adequacy</b>            |         |                                |                                            |
| Total fruit                | 5       | ≥0.8 c equivalents/1 000 kcal  | No fruit                                   |
| Whole fruit                | 5       | ≥0.4 c equivalents/1 000 kcal  | No whole fruit                             |
| Total vegetables           | 5       | ≥1.1 c equivalents/1 000 kcal  | No vegetables                              |
| Greens and beans           | 5       | ≥0.2 c equivalents/1 000 kcal  | No dark green vegetables or beans and peas |
| Whole grains               | 10      | ≥1.5 oz equivalents/1 000 kcal | No whole grains                            |
| Total dairy                | 10      | ≥1.3 c equivalents/1 000 kcal  | No dairy                                   |
| Total protein foods        | 5       | ≥2.5 oz equivalents/1 000 kcal | No protein foods                           |
| Seafood and plant proteins | 5       | ≥0.8 c equivalents/1 000 kcal  | No seafood or plant proteins               |
| Fatty Acids                | 10      | (PUFAs+MUFAs)/SFAs ≥2.5        | (PUFAs+MUFAs)/SFAs ≤1.2                    |
| <b>Moderation</b>          |         |                                |                                            |
| Sodium                     | 10      | ≤1.8 oz equivalents/1 000 kcal | ≥4.3 oz equivalents/1 000 kcal             |
| Refined grains             | 10      | ≤1.1 g/1 000 kcal              | ≥2.0 g/1 000 kcal                          |
| Saturated fats             | 10      | ≤6.5% of energy                | ≥26% of energy                             |
| Added sugars               | 10      | ≤8% of energy                  | ≥16% of energy                             |

Abbreviation: PUFAs, polyunsaturated fatty acids; MUFAs, monounsaturated fatty acids; SFAs, saturated fatty acids.

**eTable 3. Trends in Estimated Percent Energy (%E) and Absolute Intake (g/d) of Total and Subtypes of Macronutrients Among US Adults ≥20 Years by NHANES Survey Cycle, 1999-2016**

|                                        | Survey-Weighted Mean (95% CI) <sup>a</sup> |                    |                    |                    |                    |                    |                    |                    |                    | P for Trend | 2015-2016 versus 1999-2000, Difference (95% CI) |
|----------------------------------------|--------------------------------------------|--------------------|--------------------|--------------------|--------------------|--------------------|--------------------|--------------------|--------------------|-------------|-------------------------------------------------|
|                                        | 1999-2000 (n=4237)                         | 2001-2002 (n=4744) | 2003-2004 (n=4448) | 2005-2006 (n=4520) | 2007-2008 (n=5420) | 2009-2010 (n=5762) | 2011-2012 (n=4801) | 2013-2014 (n=5047) | 2015-2016 (n=5017) |             |                                                 |
| <b>Estimated Percent Energy, %</b>     |                                            |                    |                    |                    |                    |                    |                    |                    |                    |             |                                                 |
| Total carbohydrate                     | 52.5 (52.2, 52.7)                          | 52.6 (52.4, 52.8)  | 51.9 (51.5, 52.3)  | 51.6 (51.4, 51.9)  | 51.8 (51.6, 52.0)  | 52.0 (51.7, 52.2)  | 51.8 (51.5, 52.0)  | 51.1 (50.9, 51.3)  | 50.5 (50.2, 50.8)  | <.001       | -2.02 (-2.41, -1.63)                            |
| High-quality carbohydrate <sup>b</sup> | 7.42 (7.16, 7.69)                          | 7.55 (7.36, 7.73)  | 7.48 (7.18, 7.78)  | 7.85 (7.58, 8.11)  | 8.09 (7.72, 8.45)  | 8.47 (8.27, 8.67)  | 8.70 (8.47, 8.93)  | 8.50 (8.32, 8.69)  | 8.65 (8.37, 8.93)  | <.001       | 1.23 (0.84, 1.61)                               |
| Low-quality carbohydrate <sup>c</sup>  | 45.1 (44.8, 45.3)                          | 45.0 (44.8, 45.3)  | 44.4 (44.1, 44.8)  | 43.8 (43.4, 44.2)  | 43.7 (43.3, 44.1)  | 43.5 (43.3, 43.7)  | 43.1 (42.7, 43.4)  | 42.6 (42.3, 42.9)  | 41.8 (41.4, 42.3)  | <.001       | -3.25 (-3.75, -2.74)                            |
| Total protein                          | 15.5 (15.4, 15.6)                          | 15.6 (15.5, 15.7)  | 15.8 (15.6, 15.9)  | 16.0 (15.9, 16.1)  | 16.1 (15.9, 16.2)  | 16.1 (16.0, 16.2)  | 16.1 (16.0, 16.2)  | 16.3 (16.2, 16.4)  | 16.4 (16.3, 16.5)  | <.001       | 0.82 (0.67, 0.97)                               |
| Animal protein                         | 10.2 (10.1, 10.2)                          | 10.1 (10.0, 10.2)  | 10.3 (10.2, 10.4)  | 10.5 (10.4, 10.5)  | 10.5 (10.4, 10.5)  | 10.4 (10.3, 10.5)  | 10.4 (10.3, 10.4)  | 10.6 (10.5, 10.6)  | 10.6 (10.5, 10.7)  | <.001       | 0.44 (0.33, 0.54)                               |
| Plant protein                          | 5.38 (5.32, 5.43)                          | 5.45 (5.40, 5.50)  | 5.49 (5.42, 5.56)  | 5.57 (5.52, 5.62)  | 5.58 (5.52, 5.65)  | 5.68 (5.65, 5.71)  | 5.74 (5.70, 5.79)  | 5.73 (5.68, 5.78)  | 5.76 (5.68, 5.84)  | <.001       | 0.38 (0.28, 0.49)                               |
| Total fat                              | 32.0 (31.7, 32.2)                          | 31.8 (31.7, 32.0)  | 32.3 (32.0, 32.7)  | 32.3 (32.1, 32.6)  | 32.1 (31.9, 32.4)  | 31.9 (31.7, 32.2)  | 32.1 (31.9, 32.4)  | 32.6 (32.4, 32.9)  | 33.2 (32.9, 33.4)  | <.001       | 1.20 (0.84, 1.55)                               |
| Saturated fatty acids                  | 11.5 (11.4, 11.6)                          | 11.4 (11.4, 11.5)  | 11.6 (11.5, 11.8)  | 11.7 (11.6, 11.8)  | 11.6 (11.4, 11.7)  | 11.4 (11.3, 11.6)  | 11.4 (11.3, 11.5)  | 11.6 (11.5, 11.8)  | 11.9 (11.8, 12.0)  | <.001       | 0.36 (0.20, 0.51)                               |
| Monounsaturated fatty acids            | 12.9 (12.8, 13.0)                          | 12.8 (12.8, 12.9)  | 13.0 (12.9, 13.2)  | 12.9 (12.8, 13.0)  | 12.9 (12.8, 13.0)  | 12.7 (12.6, 12.8)  | 12.7 (12.6, 12.8)  | 12.8 (12.7, 12.9)  | 13.1 (13.0, 13.2)  | <.001       | 0.19 (0.03, 0.36)                               |
| Polyunsaturated fatty acids            | 7.58 (7.53, 7.63)                          | 7.58 (7.53, 7.63)  | 7.65 (7.57, 7.74)  | 7.68 (7.59, 7.76)  | 7.71 (7.67, 7.76)  | 7.80 (7.74, 7.86)  | 8.06 (8.01, 8.12)  | 8.15 (8.08, 8.23)  | 8.23 (8.16, 8.30)  | <.001       | 0.65 (0.56, 0.74)                               |

|                                                   | Survey-Weighted Mean (95% CI) <sup>a</sup> |                    |                    |                    |                    |                    |                    |                    |                    | P for Trend | 2015-2016 versus 1999-2000, Difference (95% CI) |
|---------------------------------------------------|--------------------------------------------|--------------------|--------------------|--------------------|--------------------|--------------------|--------------------|--------------------|--------------------|-------------|-------------------------------------------------|
|                                                   | 1999-2000 (n=4237)                         | 2001-2002 (n=4744) | 2003-2004 (n=4448) | 2005-2006 (n=4520) | 2007-2008 (n=5420) | 2009-2010 (n=5762) | 2011-2012 (n=4801) | 2013-2014 (n=5047) | 2015-2016 (n=5017) |             |                                                 |
| <b>Estimated Absolute Intake, g/d<sup>d</sup></b> |                                            |                    |                    |                    |                    |                    |                    |                    |                    |             |                                                 |
| Total carbohydrate                                | 262 (261, 263)                             | 262 (261, 263)     | 259 (257, 261)     | 258 (256, 259)     | 259 (257, 260)     | 259 (258, 261)     | 258 (257, 259)     | 255 (254, 256)     | 252 (251, 253)     | <.001       | -9.92 (-11.8, -8.00)                            |
| High-quality carbohydrate <sup>b</sup>            | 37.3 (35.8, 38.7)                          | 38.1 (37.2, 39.1)  | 37.6 (36.0, 39.1)  | 39.0 (37.7, 40.3)  | 39.8 (37.9, 41.7)  | 41.9 (41.0, 42.8)  | 43.1 (42.0, 44.2)  | 41.6 (40.8, 42.5)  | 42.3 (40.8, 43.7)  | <.001       | 5.00 (2.99, 7.00)                               |
| Low-quality carbohydrate <sup>c</sup>             | 224 (222, 225)                             | 223 (222, 225)     | 221 (219, 223)     | 218 (216, 220)     | 218 (216, 220)     | 217 (216, 218)     | 215 (213, 216)     | 213 (211, 214)     | 209 (207, 211)     | <.001       | -14.4 (-16.9, -11.9)                            |
| Total protein                                     | 78.2 (77.7, 78.6)                          | 78.4 (78.0, 78.8)  | 79.1 (78.5, 79.8)  | 80.2 (79.9, 80.5)  | 80.1 (79.6, 80.6)  | 80.6 (80.1, 81.0)  | 80.4 (79.9, 80.9)  | 81.1 (80.7, 81.5)  | 81.3 (80.8, 81.8)  | <.001       | 3.09 (2.43, 3.76)                               |
| Animal protein                                    | 51.2 (50.9, 51.5)                          | 50.9 (50.6, 51.3)  | 51.5 (51.0, 52.1)  | 52.3 (52.1, 52.6)  | 52.2 (51.9, 52.6)  | 52.2 (51.7, 52.7)  | 51.7 (51.3, 52.1)  | 52.6 (52.3, 52.9)  | 52.7 (52.3, 53.1)  | <.001       | 1.49 (1.01, 1.97)                               |
| Plant protein                                     | 27.0 (26.7, 27.3)                          | 27.4 (27.2, 27.7)  | 27.6 (27.2, 28.0)  | 27.9 (27.7, 28.1)  | 27.9 (27.5, 28.2)  | 28.4 (28.2, 28.5)  | 28.7 (28.5, 28.9)  | 28.5 (28.3, 28.8)  | 28.6 (28.2, 29.0)  | <.001       | 1.61 (1.10, 2.11)                               |
| Total fat                                         | 70.8 (70.2, 71.4)                          | 70.5 (70.1, 70.9)  | 71.6 (70.8, 72.5)  | 71.7 (71.2, 72.3)  | 71.4 (70.9, 71.9)  | 70.9 (70.3, 71.4)  | 71.4 (70.9, 71.9)  | 72.6 (72.0, 73.1)  | 73.9 (73.3, 74.4)  | <.001       | 3.07 (2.27, 3.87)                               |
| Saturated fatty acids                             | 25.4 (25.2, 25.7)                          | 25.3 (25.1, 25.5)  | 25.7 (25.4, 26.1)  | 26.0 (25.8, 26.2)  | 25.7 (25.4, 26.0)  | 25.4 (25.1, 25.6)  | 25.3 (25.0, 25.6)  | 25.9 (25.7, 26.2)  | 26.5 (26.2, 26.7)  | <.001       | 1.02 (0.69, 1.35)                               |
| Monounsaturated fatty acids                       | 28.5 (28.2, 28.8)                          | 28.4 (28.2, 28.5)  | 28.9 (28.5, 29.2)  | 28.7 (28.5, 28.9)  | 28.6 (28.4, 28.8)  | 28.2 (27.9, 28.4)  | 28.2 (28.0, 28.4)  | 28.5 (28.3, 28.7)  | 29.1 (28.9, 29.4)  | <.001       | 0.64 (0.26, 1.02)                               |
| Polyunsaturated fatty acids                       | 16.9 (16.7, 17.0)                          | 16.9 (16.8, 17.0)  | 17.0 (16.8, 17.2)  | 17.1 (16.9, 17.3)  | 17.1 (17.0, 17.2)  | 17.3 (17.2, 17.5)  | 17.9 (17.8, 18.0)  | 18.1 (17.9, 18.3)  | 18.3 (18.1, 18.4)  | <.001       | 1.41 (1.21, 1.61)                               |

<sup>a</sup> Data were adjusted for NHANES survey weights.

<sup>b</sup> High-quality carbohydrate was defined as carbohydrate from whole grains, whole fruit, legumes, and non-starchy vegetables.

<sup>c</sup> Low-quality carbohydrate was defined as carbohydrate from refined grains, added sugar, fruit juice, potato, other starchy vegetables, and other sources.

<sup>d</sup> Absolute Intake was adjusted for energy to 2000 kcal/d using the residual method.



**eTable 4. Trends in Estimated Percent Energy (%E) and Absolute Intake (g/d) of Total and Subtypes of Macronutrients Among US Adults ≥20 Years by NHANES Survey Cycle, 2003-2016**

|                                                       | Survey-Weighted Mean<br>(95% CI) <sup>a</sup> |                       |                       |                       |                       |                       |                       | P for<br>Trend | 2015-2016<br>versus 2003-<br>2004,<br>Difference<br>(95% CI) |
|-------------------------------------------------------|-----------------------------------------------|-----------------------|-----------------------|-----------------------|-----------------------|-----------------------|-----------------------|----------------|--------------------------------------------------------------|
|                                                       | 2003-2004<br>(n=4448)                         | 2005-2006<br>(n=4520) | 2007-2008<br>(n=5420) | 2009-2010<br>(n=5762) | 2011-2012<br>(n=4801) | 2013-2014<br>(n=5047) | 2015-2016<br>(n=5017) |                |                                                              |
| <b>Estimated Percent Energy, %</b>                    |                                               |                       |                       |                       |                       |                       |                       |                |                                                              |
| Total carbohydrate                                    | 51.9<br>(51.5, 52.3)                          | 51.6<br>(51.4, 51.9)  | 51.8<br>(51.6, 52.0)  | 52.0<br>(51.7, 52.2)  | 51.8<br>(51.5, 52.0)  | 51.1<br>(50.9, 51.3)  | 50.5<br>(50.2, 50.8)  | <.001          | -1.45<br>(-1.94, -0.96)                                      |
| High-quality carbohydrate <sup>b</sup>                | 7.48<br>(7.18, 7.78)                          | 7.85<br>(7.58, 8.11)  | 8.09<br>(7.72, 8.45)  | 8.47<br>(8.27, 8.67)  | 8.70<br>(8.47, 8.93)  | 8.50<br>(8.32, 8.69)  | 8.65<br>(8.37, 8.93)  | <.001          | 1.17<br>(0.76, 1.58)                                         |
| Low-quality carbohydrate <sup>c</sup>                 | 44.4<br>(44.1, 44.8)                          | 43.8<br>(43.4, 44.2)  | 43.7<br>(43.3, 44.1)  | 43.5<br>(43.3, 43.7)  | 43.1<br>(42.7, 43.4)  | 42.6<br>(42.3, 42.9)  | 41.8<br>(41.4, 42.3)  | <.001          | -2.62<br>(-3.20, -2.05)                                      |
| Total protein                                         | 15.8<br>(15.6, 15.9)                          | 16.0<br>(15.9, 16.1)  | 16.1<br>(15.9, 16.2)  | 16.1<br>(16.0, 16.2)  | 16.1<br>(16.0, 16.2)  | 16.3<br>(16.2, 16.4)  | 16.4<br>(16.3, 16.5)  | <.001          | 0.61<br>(0.44, 0.79)                                         |
| Animal protein                                        | 10.3<br>(10.2, 10.4)                          | 10.5<br>(10.4, 10.5)  | 10.5<br>(10.4, 10.5)  | 10.4<br>(10.3, 10.5)  | 10.4<br>(10.3, 10.4)  | 10.6<br>(10.5, 10.6)  | 10.6<br>(10.5, 10.7)  | <.001          | 0.35<br>(0.21, 0.48)                                         |
| Plant protein                                         | 5.49<br>(5.42, 5.56)                          | 5.57<br>(5.52, 5.62)  | 5.58<br>(5.52, 5.65)  | 5.68<br>(5.65, 5.71)  | 5.74<br>(5.70, 5.79)  | 5.73<br>(5.68, 5.78)  | 5.76<br>(5.68, 5.84)  | <.001          | 0.26<br>(0.16, 0.37)                                         |
| Total fat                                             | 32.3<br>(32.0, 32.7)                          | 32.3<br>(32.1, 32.6)  | 32.1<br>(31.9, 32.4)  | 31.9<br>(31.7, 32.2)  | 32.1<br>(31.9, 32.4)  | 32.6<br>(32.4, 32.9)  | 33.2<br>(32.9, 33.4)  | <.001          | 0.84<br>(0.39, 1.29)                                         |
| Saturated fatty acids                                 | 11.6<br>(11.5, 11.8)                          | 11.7<br>(11.6, 11.8)  | 11.6<br>(11.4, 11.7)  | 11.4<br>(11.3, 11.6)  | 11.4<br>(11.3, 11.5)  | 11.6<br>(11.5, 11.8)  | 11.9<br>(11.8, 12.0)  | <.001          | 0.24<br>(0.05, 0.42)                                         |
| Monounsaturated fatty acids                           | 13.0<br>(12.9, 13.2)                          | 12.9<br>(12.8, 13.0)  | 12.9<br>(12.8, 13.0)  | 12.7<br>(12.6, 12.8)  | 12.7<br>(12.6, 12.8)  | 12.8<br>(12.7, 12.9)  | 13.1<br>(13.0, 13.2)  | <.001          | 0.02<br>(-0.17, 0.22)                                        |
| Polyunsaturated fatty acids                           | 7.65<br>(7.57, 7.74)                          | 7.68<br>(7.59, 7.76)  | 7.71<br>(7.67, 7.76)  | 7.80<br>(7.74, 7.86)  | 8.06<br>(8.01, 8.12)  | 8.15<br>(8.08, 8.23)  | 8.23<br>(8.16, 8.30)  | <.001          | 0.58<br>(0.47, 0.69)                                         |
| <b>Estimated Absolute Intake,<br/>g/d<sup>d</sup></b> |                                               |                       |                       |                       |                       |                       |                       |                |                                                              |
| Total carbohydrate                                    | 259<br>(257, 261)                             | 258<br>(256, 259)     | 259<br>(257, 260)     | 259<br>(258, 261)     | 258<br>(257, 259)     | 255<br>(254, 256)     | 252<br>(251, 253)     | <.001          | -7.08<br>(-9.53, -4.64)                                      |

|                                        | Survey-Weighted Mean<br>(95% CI) <sup>a</sup> |                       |                       |                       |                       |                       |                       | P for<br>Trend | 2015-2016<br>versus 2003-<br>2004,<br>Difference<br>(95% CI) |
|----------------------------------------|-----------------------------------------------|-----------------------|-----------------------|-----------------------|-----------------------|-----------------------|-----------------------|----------------|--------------------------------------------------------------|
|                                        | 2003-2004<br>(n=4448)                         | 2005-2006<br>(n=4520) | 2007-2008<br>(n=5420) | 2009-2010<br>(n=5762) | 2011-2012<br>(n=4801) | 2013-2014<br>(n=5047) | 2015-2016<br>(n=5017) |                |                                                              |
| High-quality carbohydrate <sup>b</sup> | 37.6<br>(36.0, 39.1)                          | 39.0<br>(37.7, 40.3)  | 39.8<br>(37.9, 41.7)  | 41.9<br>(41.0, 42.8)  | 43.1<br>(42.0, 44.2)  | 41.6<br>(40.8, 42.5)  | 42.3<br>(40.8, 43.7)  | <.001          | 4.69<br>(2.58, 6.81)                                         |
| Low-quality carbohydrate <sup>c</sup>  | 221<br>(219, 223)                             | 218<br>(216, 220)     | 218<br>(216, 220)     | 217<br>(216, 218)     | 215<br>(213, 216)     | 213<br>(211, 214)     | 209<br>(207, 211)     | <.001          | -11.5<br>(-14.3, -8.6)                                       |
| Total protein                          | 79.1<br>(78.5, 79.8)                          | 80.2<br>(79.9, 80.5)  | 80.1<br>(79.6, 80.6)  | 80.6<br>(80.1, 81.0)  | 80.4<br>(79.9, 80.9)  | 81.1<br>(80.7, 81.5)  | 81.3<br>(80.8, 81.8)  | <.001          | 2.14<br>(1.30, 2.98)                                         |
| Animal protein                         | 51.5<br>(51.0, 52.1)                          | 52.3<br>(52.1, 52.6)  | 52.2<br>(51.9, 52.6)  | 52.2<br>(51.7, 52.7)  | 51.7<br>(51.3, 52.1)  | 52.6<br>(52.3, 52.9)  | 52.7<br>(52.3, 53.1)  | <.001          | 1.12<br>(0.47, 1.76)                                         |
| Plant protein                          | 27.6<br>(27.2, 28.0)                          | 27.9<br>(27.7, 28.1)  | 27.9<br>(27.5, 28.2)  | 28.4<br>(28.2, 28.5)  | 28.7<br>(28.5, 28.9)  | 28.5<br>(28.3, 28.8)  | 28.6<br>(28.2, 29.0)  | <.001          | 1.02<br>(0.46, 1.58)                                         |
| Total fat                              | 71.6<br>(70.8, 72.5)                          | 71.7<br>(71.2, 72.3)  | 71.4<br>(70.9, 71.9)  | 70.9<br>(70.3, 71.4)  | 71.4<br>(70.9, 71.9)  | 72.6<br>(72.0, 73.1)  | 73.9<br>(73.3, 74.4)  | <.001          | 2.23<br>(1.23, 3.24)                                         |
| Saturated fatty acids                  | 25.7<br>(25.4, 26.1)                          | 26.0<br>(25.8, 26.2)  | 25.7<br>(25.4, 26.0)  | 25.4<br>(25.1, 25.6)  | 25.3<br>(25.0, 25.6)  | 25.9<br>(25.7, 26.2)  | 26.5<br>(26.2, 26.7)  | <.001          | 0.74<br>(0.34, 1.14)                                         |
| Monounsaturated fatty acids            | 28.9<br>(28.5, 29.2)                          | 28.7<br>(28.5, 28.9)  | 28.6<br>(28.4, 28.8)  | 28.2<br>(27.9, 28.4)  | 28.2<br>(28.0, 28.4)  | 28.5<br>(28.3, 28.7)  | 29.1<br>(28.9, 29.4)  | <.001          | 0.25<br>(-0.19, 0.68)                                        |
| Polyunsaturated fatty acids            | 17.0<br>(16.8, 17.2)                          | 17.1<br>(16.9, 17.3)  | 17.1<br>(17.0, 17.2)  | 17.3<br>(17.2, 17.5)  | 17.9<br>(17.8, 18.0)  | 18.1<br>(17.9, 18.3)  | 18.3<br>(18.1, 18.4)  | <.001          | 1.25<br>(1.00, 1.50)                                         |

<sup>a</sup> Data were adjusted for NHANES survey weights.

<sup>b</sup> High-quality carbohydrate was defined as carbohydrate from whole grains, whole fruit, legumes, and non-starchy vegetables.

<sup>c</sup> Low-quality carbohydrate was defined as carbohydrate from refined grains, added sugar, fruit juice, potato, other starchy vegetables, and other sources.

<sup>d</sup> Absolute Intake was adjusted for energy to 2000 kcal/d using the residual method.

**eTable 5. Trends in Estimated Percent Energy (%E) and Absolute Intake (g/d) of Total and Subtypes of Macronutrients, After Adjustment for Age, Sex, Race/Ethnicity, Education, and Income Among US Adults ≥20 Years by NHANES Survey Cycle, 1999-2016<sup>a</sup>**

|                                                   | Survey-Weighted Mean<br>(95% CI) <sup>b</sup> |                       |                       |                       |                       |                       |                       |                       |                       | P for<br>Trend | 2015-2016<br>versus 1999-<br>2000,<br>Difference<br>(95% CI) |
|---------------------------------------------------|-----------------------------------------------|-----------------------|-----------------------|-----------------------|-----------------------|-----------------------|-----------------------|-----------------------|-----------------------|----------------|--------------------------------------------------------------|
|                                                   | 1999-2000<br>(n=3631)                         | 2001-2002<br>(n=4424) | 2003-2004<br>(n=4206) | 2005-2006<br>(n=4325) | 2007-2008<br>(n=4933) | 2009-2010<br>(n=5218) | 2011-2012<br>(n=4433) | 2013-2014<br>(n=4684) | 2015-2016<br>(n=4535) |                |                                                              |
| <b>Estimated Percent Energy, %</b>                |                                               |                       |                       |                       |                       |                       |                       |                       |                       |                |                                                              |
| Total carbohydrate                                | 53.3<br>(53.0, 53.6)                          | 53.5<br>(53.3, 53.7)  | 52.8<br>(52.4, 53.2)  | 52.6<br>(52.3, 52.8)  | 52.6<br>(52.5, 52.8)  | 52.7<br>(52.5, 53.0)  | 52.5<br>(52.3, 52.8)  | 51.9<br>(51.7, 52.1)  | 51.2<br>(51.0, 51.4)  | <.001          | -2.14<br>(-2.51, -1.78)                                      |
| High-quality carbohydrate <sup>b</sup>            | 8.38<br>(8.17, 8.58)                          | 8.49<br>(8.36, 8.62)  | 8.44<br>(8.21, 8.67)  | 8.71<br>(8.51, 8.92)  | 8.91<br>(8.61, 9.22)  | 9.21<br>(9.04, 9.37)  | 9.38<br>(9.15, 9.61)  | 9.13<br>(8.98, 9.27)  | 9.08<br>(8.87, 9.30)  | <.001          | 0.71<br>(0.41, 1.00)                                         |
| Low-quality carbohydrate <sup>c</sup>             | 44.9<br>(44.7, 45.2)                          | 45.0<br>(44.8, 45.2)  | 44.3<br>(44.1, 44.6)  | 43.8<br>(43.5, 44.2)  | 43.7<br>(43.4, 44.1)  | 43.5<br>(43.3, 43.8)  | 43.2<br>(42.9, 43.4)  | 42.8<br>(42.5, 43.0)  | 42.1<br>(41.8, 42.4)  | <.001          | -2.85<br>(-3.25, -2.45)                                      |
| Total protein                                     | 15.8<br>(15.7, 15.9)                          | 15.8<br>(15.7, 15.9)  | 16.0<br>(15.9, 16.2)  | 16.3<br>(16.2, 16.4)  | 16.3<br>(16.2, 16.4)  | 16.4<br>(16.3, 16.5)  | 16.3<br>(16.2, 16.4)  | 16.5<br>(16.4, 16.6)  | 16.5<br>(16.4, 16.6)  | <.001          | 0.74<br>(0.60, 0.88)                                         |
| Animal protein                                    | 10.3<br>(10.2, 10.4)                          | 10.3<br>(10.2, 10.3)  | 10.4<br>(10.3, 10.5)  | 10.6<br>(10.5, 10.7)  | 10.6<br>(10.5, 10.7)  | 10.6<br>(10.5, 10.7)  | 10.5<br>(10.4, 10.5)  | 10.7<br>(10.6, 10.8)  | 10.7<br>(10.6, 10.8)  | <.001          | 0.44<br>(0.33, 0.54)                                         |
| Plant protein                                     | 5.51<br>(5.46, 5.56)                          | 5.57<br>(5.52, 5.61)  | 5.63<br>(5.58, 5.68)  | 5.69<br>(5.64, 5.73)  | 5.69<br>(5.63, 5.75)  | 5.78<br>(5.74, 5.81)  | 5.83<br>(5.78, 5.87)  | 5.80<br>(5.75, 5.85)  | 5.81<br>(5.74, 5.88)  | <.001          | 0.30<br>(0.21, 0.39)                                         |
| Total fat                                         | 30.9<br>(30.6, 31.2)                          | 30.7<br>(30.5, 30.9)  | 31.2<br>(30.8, 31.5)  | 31.1<br>(30.9, 31.4)  | 31.1<br>(30.9, 31.2)  | 30.9<br>(30.7, 31.1)  | 31.2<br>(30.9, 31.4)  | 31.6<br>(31.4, 31.8)  | 32.3<br>(32.1, 32.5)  | <.001          | 1.40<br>(1.07, 1.73)                                         |
| Saturated fatty acids                             | 10.9<br>(10.8, 11.0)                          | 10.8<br>(10.7, 10.9)  | 11.0<br>(10.8, 11.1)  | 11.1<br>(11.0, 11.1)  | 10.9<br>(10.8, 11.0)  | 10.8<br>(10.8, 10.9)  | 10.8<br>(10.7, 10.9)  | 11.1<br>(11.0, 11.2)  | 11.4<br>(11.3, 11.4)  | <.001          | 0.49<br>(0.37, 0.62)                                         |
| Monounsaturated fatty acids                       | 12.5<br>(12.4, 12.7)                          | 12.5<br>(12.4, 12.5)  | 12.7<br>(12.5, 12.8)  | 12.5<br>(12.4, 12.6)  | 12.5<br>(12.4, 12.6)  | 12.3<br>(12.3, 12.4)  | 12.4<br>(12.3, 12.5)  | 12.5<br>(12.4, 12.5)  | 12.8<br>(12.7, 12.9)  | <.001          | 0.26<br>(0.10, 0.43)                                         |
| Polyunsaturated fatty acids                       | 7.50<br>(7.43, 7.56)                          | 7.46<br>(7.40, 7.52)  | 7.56<br>(7.47, 7.64)  | 7.56<br>(7.47, 7.64)  | 7.60<br>(7.55, 7.65)  | 7.70<br>(7.65, 7.76)  | 7.96<br>(7.92, 8.01)  | 8.04<br>(7.98, 8.10)  | 8.14<br>(8.08, 8.20)  | <.001          | 0.65<br>(0.56, 0.74)                                         |
| <b>Estimated Absolute Intake, g/d<sup>c</sup></b> |                                               |                       |                       |                       |                       |                       |                       |                       |                       |                |                                                              |
| Total carbohydrate                                | 266<br>(265, 268)                             | 267<br>(266, 268)     | 264<br>(262, 265)     | 262<br>(261, 264)     | 263<br>(262, 264)     | 263<br>(262, 264)     | 262<br>(261, 264)     | 259<br>(258, 260)     | 256<br>(255, 257)     | <.001          | -10.6<br>(-12.4, -8.8)                                       |

|                                        | Survey-Weighted Mean<br>(95% CI) <sup>b</sup> |                       |                       |                       |                       |                       |                       |                       |                       | P for<br>Trend | 2015-2016<br>versus 1999-<br>2000,<br>Difference<br>(95% CI) |
|----------------------------------------|-----------------------------------------------|-----------------------|-----------------------|-----------------------|-----------------------|-----------------------|-----------------------|-----------------------|-----------------------|----------------|--------------------------------------------------------------|
|                                        | 1999-2000<br>(n=3631)                         | 2001-2002<br>(n=4424) | 2003-2004<br>(n=4206) | 2005-2006<br>(n=4325) | 2007-2008<br>(n=4933) | 2009-2010<br>(n=5218) | 2011-2012<br>(n=4433) | 2013-2014<br>(n=4684) | 2015-2016<br>(n=4535) |                |                                                              |
| High-quality carbohydrate <sup>b</sup> | 40.5<br>(39.4, 41.6)                          | 41.2<br>(40.5, 41.9)  | 40.7<br>(39.6, 41.9)  | 41.7<br>(40.6, 42.8)  | 42.5<br>(40.9, 44.0)  | 44.1<br>(43.3, 44.9)  | 45.1<br>(44.0, 46.2)  | 43.4<br>(42.7, 44.1)  | 43.3<br>(42.1, 44.5)  | <.001          | 2.80<br>(1.15, 4.44)                                         |
| Low-quality carbohydrate <sup>c</sup>  | 225<br>(223, 226)                             | 225<br>(224, 226)     | 222<br>(220, 223)     | 220<br>(218, 221)     | 219<br>(218, 221)     | 218<br>(217, 220)     | 217<br>(215, 218)     | 215<br>(214, 216)     | 212<br>(210, 213)     | <.001          | -12.8<br>(-14.7, -10.8)                                      |
| Total protein                          | 78.6<br>(78.2, 79.0)                          | 78.7<br>(78.4, 79.1)  | 79.7<br>(79.1, 80.2)  | 80.7<br>(80.4, 81.0)  | 80.6<br>(80.2, 81.0)  | 81.0<br>(80.7, 81.3)  | 80.6<br>(80.3, 81.0)  | 81.4<br>(81.0, 81.7)  | 81.5<br>(81.1, 81.9)  | <.001          | 2.90<br>(2.33, 3.46)                                         |
| Animal protein                         | 51.2<br>(51.0, 51.5)                          | 51.0<br>(50.7, 51.4)  | 51.7<br>(51.2, 52.2)  | 52.5<br>(52.2, 52.8)  | 52.4<br>(52.1, 52.7)  | 52.4<br>(52.0, 52.8)  | 51.8<br>(51.5, 52.0)  | 52.7<br>(52.4, 53.0)  | 52.8<br>(52.5, 53.2)  | <.001          | 1.63<br>(1.19, 2.06)                                         |
| Plant protein                          | 27.4<br>(27.2, 27.7)                          | 27.7<br>(27.5, 27.9)  | 28.0<br>(27.7, 28.2)  | 28.2<br>(28.0, 28.4)  | 28.1<br>(27.9, 28.4)  | 28.6<br>(28.4, 28.8)  | 28.9<br>(28.7, 29.1)  | 28.6<br>(28.4, 28.9)  | 28.7<br>(28.3, 29.0)  | <.001          | 1.27<br>(0.83, 1.70)                                         |
| Total fat                              | 68.7<br>(68.0, 69.4)                          | 68.3<br>(67.8, 68.7)  | 69.4<br>(68.7, 70.2)  | 69.4<br>(68.9, 69.9)  | 69.3<br>(68.9, 69.7)  | 68.9<br>(68.5, 69.3)  | 69.5<br>(69.0, 70.0)  | 70.6<br>(70.2, 70.9)  | 72.1<br>(71.7, 72.5)  | <.001          | 3.44<br>(2.68, 4.19)                                         |
| Saturated fatty acids                  | 24.2<br>(23.9, 24.4)                          | 24.0<br>(23.8, 24.2)  | 24.4<br>(24.1, 24.7)  | 24.7<br>(24.5, 24.9)  | 24.4<br>(24.3, 24.6)  | 24.2<br>(24.0, 24.4)  | 24.2<br>(24.0, 24.4)  | 24.8<br>(24.7, 25.0)  | 25.5<br>(25.3, 25.6)  | <.001          | 1.28<br>(1.00, 1.56)                                         |
| Monounsaturated fatty acids            | 27.9<br>(27.5, 28.2)                          | 27.7<br>(27.5, 27.9)  | 28.2<br>(27.9, 28.5)  | 28.0<br>(27.7, 28.2)  | 28.0<br>(27.8, 28.2)  | 27.6<br>(27.4, 27.7)  | 27.6<br>(27.4, 27.8)  | 27.9<br>(27.8, 28.0)  | 28.6<br>(28.4, 28.8)  | <.001          | 0.75<br>(0.37, 1.13)                                         |
| Polyunsaturated fatty acids            | 16.7<br>(16.5, 16.8)                          | 16.6<br>(16.4, 16.7)  | 16.8<br>(16.6, 17.0)  | 16.8<br>(16.6, 17.0)  | 16.9<br>(16.8, 17.0)  | 17.1<br>(17.0, 17.2)  | 17.7<br>(17.6, 17.8)  | 17.8<br>(17.7, 18.0)  | 18.1<br>(17.9, 18.2)  | <.001          | 1.41<br>(1.21, 1.61)                                         |

<sup>a</sup> Adjusted for sex (male, female), age group (20-34, 35-49, 50-64, ≥65 y), race/ethnicity (non-Hispanic white, non-Hispanic black, Hispanic, other), education level (less than 12th grade, high school graduate, and college or above), and ratio of family income to poverty (<1.30, 1.30-3.49, ≥3.5).

<sup>b</sup> Data were adjusted for NHANES survey weights.

<sup>c</sup> Absolute Intake was adjusted for energy to 2000 kcal/d using the residual method.

**eTable 6. Trends in Estimated Absolute Intake of Carbohydrate and Protein From Different Sources (g/d) Among Adults ≥20 Years by NHANES Survey Cycle, 1999-2016<sup>a</sup>**

| Estimated Absolute Intake, g/d | Survey-Weighted Mean (95% CI) |                       |                       |                       |                       |                       |                       |                       |                       | P for Trend | 2015-2016 versus 1999-2000, Difference (95% CI) |
|--------------------------------|-------------------------------|-----------------------|-----------------------|-----------------------|-----------------------|-----------------------|-----------------------|-----------------------|-----------------------|-------------|-------------------------------------------------|
|                                | 1999-2000<br>(n=4237)         | 2001-2002<br>(n=4744) | 2003-2004<br>(n=4448) | 2005-2006<br>(n=4520) | 2007-2008<br>(n=5420) | 2009-2010<br>(n=5762) | 2011-2012<br>(n=4801) | 2013-2014<br>(n=5047) | 2015-2016<br>(n=5017) |             |                                                 |
| <b>Carbohydrate</b>            |                               |                       |                       |                       |                       |                       |                       |                       |                       |             |                                                 |
| <b>High quality sources</b>    |                               |                       |                       |                       |                       |                       |                       |                       |                       |             |                                                 |
|                                | 10.1                          | 10.9                  | 10.5                  | 11.4                  | 11.4                  | 12.3                  | 13.0                  | 12.6                  | 13.0                  |             | 2.95                                            |
| Whole grains                   | (9.65, 10.5)                  | (10.5, 11.3)          | (10.0, 11.1)          | (10.8, 12.0)          | (10.7, 12.1)          | (11.9, 12.7)          | (12.3, 13.6)          | (12.2, 13.0)          | (12.4, 13.6)          | <.001       | (2.20, 3.70)                                    |
|                                | 14.3                          | 14.6                  | 14.3                  | 14.9                  | 15.5                  | 16.5                  | 16.3                  | 15.5                  | 15.5                  |             | 1.21                                            |
| Whole fruit                    | (13.5, 15.2)                  | (14.1, 15.1)          | (13.4, 15.2)          | (14.2, 15.6)          | (14.6, 16.4)          | (16.1, 16.8)          | (15.6, 16.9)          | (14.8, 16.1)          | (14.8, 16.3)          | <.001       | (0.09, 2.34)                                    |
|                                | 8.41                          | 8.42                  | 8.56                  | 8.52                  | 8.47                  | 8.70                  | 9.09                  | 8.87                  | 8.84                  |             | 0.44                                            |
| Non-starchy vegetable          | (8.24, 8.57)                  | (8.29, 8.55)          | (8.34, 8.77)          | (8.32, 8.72)          | (8.25, 8.69)          | (8.54, 8.86)          | (8.88, 9.29)          | (8.74, 9.01)          | (8.66, 9.03)          | <.001       | (0.19, 0.69)                                    |
|                                | 4.44                          | 4.26                  | 4.19                  | 4.11                  | 4.33                  | 4.50                  | 4.81                  | 4.66                  | 4.83                  |             | 0.38                                            |
| Legumes                        | (4.13, 4.75)                  | (4.01, 4.51)          | (3.86, 4.51)          | (3.86, 4.36)          | (4.04, 4.62)          | (4.16, 4.84)          | (4.49, 5.14)          | (4.46, 4.86)          | (4.58, 5.07)          | <.001       | (-0.01, 0.78)                                   |
| <b>Low-quality sources</b>     |                               |                       |                       |                       |                       |                       |                       |                       |                       |             |                                                 |
|                                | 76.4                          | 76.6                  | 75.6                  | 75.5                  | 76.6                  | 77.7                  | 79.4                  | 79.2                  | 79.6                  |             | 3.12                                            |
| Refined grains                 | (75.2, 77.6)                  | (75.5, 77.6)          | (74.5, 76.6)          | (74.5, 76.5)          | (75.8, 77.5)          | (76.6, 78.9)          | (78.3, 80.5)          | (78.4, 80.1)          | (78.1, 81.0)          | <.001       | (1.26, 4.99)                                    |
|                                | 19.6                          | 19.6                  | 19.2                  | 18.2                  | 17.2                  | 17.4                  | 16.6                  | 14.3                  | 14.1                  |             | -5.53                                           |
| Fruit juice                    | (18.5, 20.7)                  | (18.7, 20.4)          | (17.7, 20.6)          | (17.1, 19.2)          | (16.2, 18.2)          | (16.7, 18.0)          | (15.1, 18.1)          | (13.7, 15.0)          | (13.2, 14.9)          | <.001       | (-6.93, -4.14)                                  |
|                                | 12.5                          | 12.5                  | 12.6                  | 12.5                  | 12.6                  | 12.4                  | 12.2                  | 12.3                  | 12.5                  |             | -0.05                                           |
| Potato                         | (12.2, 12.8)                  | (12.3, 12.7)          | (12.3, 13.0)          | (12.2, 12.9)          | (12.3, 13.0)          | (12.2, 12.7)          | (12.0, 12.4)          | (12.1, 12.5)          | (12.2, 12.7)          | .28         | (-0.45, 0.36)                                   |
|                                | 2.93                          | 2.97                  | 2.96                  | 3.00                  | 2.97                  | 2.92                  | 2.88                  | 2.82                  | 2.84                  |             | -0.09                                           |
| Other starchy vegetable        | (2.89, 2.97)                  | (2.93, 3.00)          | (2.88, 3.04)          | (2.90, 3.10)          | (2.91, 3.03)          | (2.86, 2.98)          | (2.81, 2.95)          | (2.78, 2.86)          | (2.78, 2.90)          | <.001       | (-0.16, -0.02)                                  |

| Estimated Absolute Intake, g/d | Survey-Weighted Mean (95% CI) |                       |                       |                       |                       |                       |                       |                       |                       | P for Trend | 2015-2016 versus 1999-2000, Difference (95% CI) |
|--------------------------------|-------------------------------|-----------------------|-----------------------|-----------------------|-----------------------|-----------------------|-----------------------|-----------------------|-----------------------|-------------|-------------------------------------------------|
|                                | 1999-2000<br>(n=4237)         | 2001-2002<br>(n=4744) | 2003-2004<br>(n=4448) | 2005-2006<br>(n=4520) | 2007-2008<br>(n=5420) | 2009-2010<br>(n=5762) | 2011-2012<br>(n=4801) | 2013-2014<br>(n=5047) | 2015-2016<br>(n=5017) |             |                                                 |
|                                | 79.3                          | 78.3                  | 76.2                  | 73.7                  | 75.0                  | 73.6                  | 73.3                  | 73.7                  | 72.3                  |             | -6.96                                           |
| Added sugar                    | (76.7, 81.8)                  | (76.5, 80.0)          | (74.1, 78.3)          | (72.0, 75.5)          | (72.4, 77.6)          | (72.4, 74.7)          | (71.5, 75.0)          | (72.3, 75.2)          | (70.3, 74.3)          | <.001       | (-10.22, -3.69)                                 |
|                                | 32.3                          | 33.1                  | 34.0                  | 34.8                  | 33.4                  | 32.6                  | 30.1                  | 30.3                  | 28.0                  |             | -4.35                                           |
| Other sources                  | (32.0, 32.7)                  | (32.7, 33.6)          | (33.2, 34.7)          | (34.3, 35.3)          | (32.8, 34.0)          | (32.2, 32.9)          | (29.5, 30.7)          | (29.7, 30.8)          | (27.4, 28.6)          | <.001       | (-5.08, -3.62)                                  |
| <b>Protein</b>                 |                               |                       |                       |                       |                       |                       |                       |                       |                       |             |                                                 |
| <b>Animal sources</b>          | 13.6                          | 13.3                  | 13.7                  | 13.7                  | 13.7                  | 13.6                  | 13.6                  | 13.6                  | 13.7                  |             | 0.13                                            |
| Unprocessed red meat           | (13.4, 13.7)                  | (13.2, 13.5)          | (13.5, 13.9)          | (13.5, 13.9)          | (13.5, 13.9)          | (13.4, 13.8)          | (13.3, 13.9)          | (13.5, 13.7)          | (13.5, 13.9)          | .26         | (-0.13, 0.39)                                   |
|                                | 5.47                          | 5.54                  | 5.63                  | 5.69                  | 5.62                  | 5.56                  | 5.53                  | 5.57                  | 5.55                  |             | 0.08                                            |
| Processed meat                 | (5.35, 5.60)                  | (5.43, 5.65)          | (5.44, 5.83)          | (5.48, 5.90)          | (5.49, 5.75)          | (5.38, 5.73)          | (5.42, 5.63)          | (5.41, 5.72)          | (5.45, 5.65)          | .75         | (-0.09, 0.24)                                   |
|                                | 12.0                          | 12.0                  | 12.0                  | 12.2                  | 12.4                  | 12.3                  | 12.3                  | 12.5                  | 12.5                  |             | 0.46                                            |
| Poultry                        | (11.8, 12.2)                  | (11.8, 12.2)          | (11.7, 12.3)          | (12.0, 12.5)          | (12.1, 12.7)          | (12.0, 12.6)          | (11.9, 12.6)          | (12.3, 12.8)          | (12.1, 12.8)          | .003        | (0.08, 0.84)                                    |
|                                | 3.78                          | 3.71                  | 3.80                  | 3.88                  | 3.81                  | 3.91                  | 3.90                  | 3.93                  | 3.88                  |             | 0.09                                            |
| Seafood                        | (3.69, 3.88)                  | (3.64, 3.79)          | (3.66, 3.95)          | (3.76, 4.00)          | (3.70, 3.93)          | (3.77, 4.05)          | (3.75, 4.05)          | (3.77, 4.10)          | (3.73, 4.03)          | .08         | (-0.08, 0.27)                                   |
|                                | 12.7                          | 12.7                  | 12.8                  | 13.0                  | 12.9                  | 13.0                  | 12.5                  | 12.9                  | 13.0                  |             | 0.34                                            |
| Dairy                          | (12.5, 12.9)                  | (12.5, 12.9)          | (12.4, 13.1)          | (12.8, 13.3)          | (12.5, 13.3)          | (12.8, 13.2)          | (12.1, 12.8)          | (12.7, 13.2)          | (12.6, 13.4)          | .07         | (-0.12, 0.81)                                   |
|                                | 3.51                          | 3.51                  | 3.50                  | 3.71                  | 3.73                  | 3.72                  | 3.75                  | 3.87                  | 3.93                  |             | 0.42                                            |
| Eggs                           | (3.45, 3.57)                  | (3.46, 3.55)          | (3.39, 3.61)          | (3.64, 3.78)          | (3.65, 3.81)          | (3.62, 3.82)          | (3.70, 3.81)          | (3.80, 3.94)          | (3.84, 4.01)          | <.001       | (0.31, 0.52)                                    |
|                                | 0.03                          | 0.03                  | 0.03                  | 0.03                  | 0.03                  | 0.03                  | 0.03                  | 0.03                  | 0.03                  |             | 0.00                                            |
| Other animal sources           | (0.03, 0.04)                  | (0.03, 0.03)          | (0.03, 0.03)          | (0.03, 0.03)          | (0.02, 0.03)          | (0.03, 0.03)          | (0.03, 0.03)          | (0.03, 0.03)          | (0.03, 0.03)          | <.001       | (-0.01, 0.00)                                   |

| Estimated Absolute Intake, g/d | Survey-Weighted Mean (95% CI) |                       |                       |                       |                       |                       |                       |                       |                       | P for Trend | 2015-2016 versus 1999-2000, Difference (95% CI) |
|--------------------------------|-------------------------------|-----------------------|-----------------------|-----------------------|-----------------------|-----------------------|-----------------------|-----------------------|-----------------------|-------------|-------------------------------------------------|
|                                | 1999-2000<br>(n=4237)         | 2001-2002<br>(n=4744) | 2003-2004<br>(n=4448) | 2005-2006<br>(n=4520) | 2007-2008<br>(n=5420) | 2009-2010<br>(n=5762) | 2011-2012<br>(n=4801) | 2013-2014<br>(n=5047) | 2015-2016<br>(n=5017) |             |                                                 |
| <b>Plant sources</b>           | 1.93                          | 2.09                  | 2.01                  | 2.20                  | 2.22                  | 2.34                  | 2.60                  | 2.51                  | 2.47                  |             | 0.54                                            |
| Whole grains                   | (1.85, 2.01)<br>13.3          | (2.01, 2.17)<br>13.4  | (1.91, 2.11)<br>13.4  | (2.08, 2.31)<br>13.3  | (2.07, 2.37)<br>13.4  | (2.28, 2.41)<br>13.5  | (2.45, 2.75)<br>13.5  | (2.43, 2.60)<br>13.4  | (2.34, 2.60)<br>13.3  | <.001       | (0.39, 0.70)<br>0.04                            |
| Refined grains                 | (13.1, 13.4)<br>1.82          | (13.3, 13.5)<br>1.87  | (13.3, 13.6)<br>1.96  | (13.2, 13.5)<br>2.02  | (13.3, 13.5)<br>1.94  | (13.3, 13.6)<br>2.05  | (13.4, 13.6)<br>2.15  | (13.3, 13.6)<br>2.20  | (13.1, 13.5)<br>2.26  | .41         | (-0.19, 0.27)<br>0.44                           |
| Nuts                           | (1.73, 1.90)<br>1.55          | (1.80, 1.94)<br>1.49  | (1.84, 2.08)<br>1.47  | (1.94, 2.10)<br>1.45  | (1.83, 2.04)<br>1.52  | (1.97, 2.13)<br>1.54  | (2.04, 2.27)<br>1.65  | (2.07, 2.33)<br>1.61  | (2.07, 2.44)<br>1.68  | <.001       | (0.24, 0.64)<br>0.13                            |
| Legumes                        | (1.45, 1.65)<br>0.60          | (1.41, 1.57)<br>0.61  | (1.37, 1.57)<br>0.74  | (1.36, 1.53)<br>0.75  | (1.43, 1.61)<br>0.76  | (1.43, 1.65)<br>0.81  | (1.54, 1.75)<br>0.73  | (1.55, 1.68)<br>0.77  | (1.60, 1.76)<br>0.95  | .001        | (0.00, 0.26)<br>0.35                            |
| Soy                            | (0.53, 0.67)<br>7.82          | (0.56, 0.66)<br>7.93  | (0.65, 0.83)<br>7.97  | (0.66, 0.84)<br>8.11  | (0.69, 0.83)<br>7.99  | (0.76, 0.86)<br>8.13  | (0.66, 0.80)<br>8.06  | (0.69, 0.85)<br>7.98  | (0.82, 1.09)<br>7.91  | <.001       | (0.20, 0.51)<br>0.09                            |
| Other plant sources            | (7.74, 7.91)                  | (7.86, 8.00)          | (7.89, 8.05)          | (7.97, 8.24)          | (7.91, 8.06)          | (8.03, 8.23)          | (7.91, 8.22)          | (7.83, 8.12)          | (7.73, 8.09)          | <.001       | (-0.12, 0.29)                                   |

Abbreviation: NHANES, National Health and Nutrition Examination Survey.

<sup>a</sup> The means were survey-weighted and adjusted for energy to 2000 kcal/d using the residual method.

**eTable 7. Trends in Estimated Percent Energy (%E) From High- and Low-Quality Carbohydrate by Age Group, Sex, Race/Ethnicity, Education, and Income, 1999-2016**

| Estimated Percent Energy, %      | Survey-Weighted Mean (95% CI) |                      |                      |                      |                      |                      |                      |                      |                      | P for Trend | 2015-2016 versus 1999-2000, Difference (95% CI) |
|----------------------------------|-------------------------------|----------------------|----------------------|----------------------|----------------------|----------------------|----------------------|----------------------|----------------------|-------------|-------------------------------------------------|
|                                  | 1999-2000                     | 2001-2002            | 2003-2004            | 2005-2006            | 2007-2008            | 2009-2010            | 2011-2012            | 2013-2014            | 2015-2016            |             |                                                 |
| <b>High-quality carbohydrate</b> |                               |                      |                      |                      |                      |                      |                      |                      |                      |             |                                                 |
| <b>Age group, y</b>              |                               |                      |                      |                      |                      |                      |                      |                      |                      |             |                                                 |
| 20-34                            | 5.56<br>(5.27, 5.84)          | 5.90<br>(5.65, 6.14) | 5.70<br>(5.28, 6.11) | 6.06<br>(5.76, 6.36) | 6.29<br>(5.95, 6.64) | 6.70<br>(6.41, 6.99) | 6.94<br>(6.68, 7.20) | 6.70<br>(6.48, 6.91) | 7.19<br>(6.76, 7.62) | <.001       | 1.64<br>(1.12, 2.15)                            |
| 35-49                            | 6.90<br>(6.66, 7.14)          | 6.91<br>(6.72, 7.09) | 6.85<br>(6.48, 7.23) | 7.26<br>(6.88, 7.64) | 7.29<br>(6.84, 7.73) | 7.94<br>(7.58, 8.30) | 8.08<br>(7.59, 8.57) | 8.08<br>(7.85, 8.31) | 8.07<br>(7.70, 8.44) | <.001       | 1.17<br>(0.74, 1.61)                            |
| 50-64                            | 8.52<br>(8.02, 9.02)          | 8.55<br>(8.21, 8.89) | 8.34<br>(7.94, 8.74) | 8.63<br>(8.09, 9.17) | 9.19<br>(8.69, 9.68) | 9.34<br>(8.97, 9.72) | 9.45<br>(9.15, 9.74) | 9.08<br>(8.77, 9.39) | 9.12<br>(8.81, 9.43) | <.001       | 0.60<br>(0.01, 1.19)                            |
| ≥65                              | 10.2<br>(9.86, 10.5)          | 10.2<br>(9.89, 10.4) | 10.3<br>(10.0, 10.6) | 10.6<br>(10.2, 10.9) | 10.8<br>(10.4, 11.3) | 10.9<br>(10.5, 11.3) | 11.2<br>(10.8, 11.6) | 11.0<br>(10.5, 11.4) | 10.7<br>(10.4, 10.9) | <.001       | 0.51<br>(0.10, 0.92)                            |
| P for interaction                |                               |                      |                      |                      | .005                 |                      |                      |                      |                      |             |                                                 |
| <b>Sex</b>                       |                               |                      |                      |                      |                      |                      |                      |                      |                      |             |                                                 |
| Male                             | 6.67<br>(6.41, 6.93)          | 6.81<br>(6.62, 6.99) | 6.78<br>(6.49, 7.07) | 6.96<br>(6.66, 7.26) | 7.27<br>(6.89, 7.64) | 7.61<br>(7.34, 7.87) | 7.92<br>(7.71, 8.13) | 7.71<br>(7.52, 7.90) | 7.93<br>(7.63, 8.24) | <.001       | 1.26<br>(0.86, 1.66)                            |
| Female                           | 8.11<br>(7.78, 8.44)          | 8.24<br>(8.01, 8.47) | 8.12<br>(7.75, 8.50) | 8.67<br>(8.36, 8.99) | 8.81<br>(8.42, 9.20) | 9.27<br>(9.09, 9.45) | 9.44<br>(9.08, 9.80) | 9.25<br>(9.03, 9.47) | 9.32<br>(8.99, 9.64) | <.001       | 1.21<br>(0.74, 1.67)                            |
| P for interaction                |                               |                      |                      |                      | .51                  |                      |                      |                      |                      |             |                                                 |
| <b>Race/ethnicity</b>            |                               |                      |                      |                      |                      |                      |                      |                      |                      |             |                                                 |
| Non-Hispanic white               | 7.12<br>(6.86, 7.38)          | 7.39<br>(7.18, 7.59) | 7.33<br>(7.02, 7.65) | 7.80<br>(7.54, 8.06) | 7.88<br>(7.39, 8.36) | 8.33<br>(8.11, 8.55) | 8.52<br>(8.26, 8.78) | 8.15<br>(7.91, 8.40) | 8.32<br>(7.97, 8.68) | <.001       | 1.21<br>(0.77, 1.64)                            |
| Non-Hispanic black               | 7.15<br>(6.85, 7.45)          | 6.95<br>(6.71, 7.19) | 6.76<br>(6.44, 7.09) | 7.09<br>(6.52, 7.66) | 7.27<br>(7.07, 7.46) | 7.54<br>(7.17, 7.92) | 7.59<br>(7.04, 8.15) | 7.70<br>(7.38, 8.02) | 7.76<br>(7.39, 8.13) | <.001       | 0.61<br>(0.13, 1.09)                            |
| Hispanic                         | 8.54<br>(8.16, 8.91)          | 8.24<br>(7.89, 8.58) | 8.33<br>(7.94, 8.72) | 8.27<br>(7.99, 8.56) | 8.83<br>(8.59, 9.06) | 8.83<br>(8.57, 9.10) | 9.07<br>(8.77, 9.37) | 9.18<br>(8.84, 9.52) | 9.20<br>(8.93, 9.46) | <.001       | 0.66<br>(0.20, 1.12)                            |
| Other                            | 9.13<br>(8.14, 10.1)          | 9.91<br>(8.92, 10.9) | 9.37<br>(8.38, 10.4) | 9.38<br>(8.69, 10.1) | 10.7<br>(9.94, 11.5) | 10.8<br>(10.2, 11.5) | 11.2<br>(10.6, 11.8) | 11.2<br>(10.5, 11.9) | 11.0<br>(10.4, 11.6) | <.001       | 1.89<br>(0.74, 3.04)                            |
| P for interaction                |                               |                      |                      |                      | .004                 |                      |                      |                      |                      |             |                                                 |



| Estimated Percent                              | Survey-Weighted Mean (95% CI) |              |              |              |              |              |              |              |              | P for Trend | 2015-2016 versus 1999-2000, Difference (95% CI) |
|------------------------------------------------|-------------------------------|--------------|--------------|--------------|--------------|--------------|--------------|--------------|--------------|-------------|-------------------------------------------------|
|                                                | Energy, %                     | 1999-2000    | 2001-2002    | 2003-2004    | 2005-2006    | 2007-2008    | 2009-2010    | 2011-2012    | 2013-2014    |             |                                                 |
| <b>Education level</b>                         |                               |              |              |              |              |              |              |              |              |             |                                                 |
| <High school graduate                          | 7.77                          | 7.62         | 7.82         | 7.99         | 7.94         | 8.26         | 8.36         | 8.22         | 8.66         | .002        | 0.90                                            |
|                                                | (7.39, 8.14)                  | (7.19, 8.05) | (7.40, 8.25) | (7.55, 8.43) | (7.52, 8.37) | (7.84, 8.69) | (7.97, 8.75) | (7.83, 8.61) | (8.36, 8.97) |             | (0.41, 1.38)                                    |
| High school graduate or GED                    | 7.23                          | 7.19         | 7.03         | 7.41         | 7.65         | 7.57         | 8.21         | 7.76         | 7.78         | <.001       | 0.55                                            |
|                                                | (6.85, 7.61)                  | (6.93, 7.44) | (6.62, 7.44) | (7.11, 7.70) | (7.28, 8.03) | (7.30, 7.84) | (7.87, 8.56) | (7.40, 8.11) | (7.37, 8.19) |             | (-0.01, 1.11)                                   |
| Some college or above                          | 7.35                          | 7.68         | 7.57         | 8.00         | 8.35         | 8.88         | 8.94         | 8.83         | 8.93         | <.001       | 1.57                                            |
|                                                | (7.05, 7.66)                  | (7.48, 7.88) | (7.29, 7.86) | (7.69, 8.31) | (7.95, 8.74) | (8.71, 9.04) | (8.66, 9.21) | (8.61, 9.06) | (8.62, 9.24) |             | (1.14, 2.01)                                    |
| P for interaction                              |                               |              |              |              |              |              |              |              |              |             | <.001                                           |
| <b>Ratio of family income to poverty level</b> |                               |              |              |              |              |              |              |              |              |             |                                                 |
| <1.30                                          | 7.38                          | 7.31         | 7.06         | 7.58         | 7.44         | 7.72         | 7.85         | 7.79         | 8.19         | .03         | 0.81                                            |
|                                                | (6.94, 7.82)                  | (6.89, 7.72) | (6.51, 7.61) | (7.18, 7.98) | (6.94, 7.94) | (7.51, 7.94) | (7.32, 8.37) | (7.48, 8.10) | (7.77, 8.61) |             | (0.20, 1.42)                                    |
| 1.30-3.49                                      | 7.29                          | 7.47         | 7.58         | 7.77         | 8.14         | 8.29         | 8.61         | 8.40         | 8.23         | <.001       | 0.94                                            |
|                                                | (6.99, 7.58)                  | (7.22, 7.72) | (7.18, 7.98) | (7.47, 8.06) | (7.81, 8.46) | (8.06, 8.53) | (8.34, 8.87) | (8.11, 8.69) | (7.91, 8.55) |             | (0.50, 1.38)                                    |
| ≥3.50                                          | 7.42                          | 7.65         | 7.64         | 7.97         | 8.22         | 8.85         | 9.26         | 9.00         | 9.04         | <.001       | 1.61                                            |
|                                                | (7.08, 7.77)                  | (7.45, 7.86) | (7.40, 7.89) | (7.60, 8.34) | (7.77, 8.68) | (8.50, 9.20) | (8.91, 9.61) | (8.74, 9.26) | (8.71, 9.36) |             | (1.14, 2.09)                                    |
| P for interaction                              |                               |              |              |              |              |              |              |              |              |             | <.001                                           |
| <b>Low-quality carbohydrate</b>                |                               |              |              |              |              |              |              |              |              |             |                                                 |
| <b>Age group, y</b>                            |                               |              |              |              |              |              |              |              |              |             |                                                 |
| 20-34                                          | 47.6                          | 47.5         | 46.7         | 46.1         | 46.3         | 46.0         | 45.2         | 44.7         | 43.4         | <.001       | -4.14                                           |
|                                                | (47.1, 48.0)                  | (47.1, 47.9) | (46.2, 47.2) | (45.7, 46.5) | (45.9, 46.7) | (45.6, 46.4) | (44.7, 45.6) | (44.3, 45.1) | (42.7, 44.1) |             | (-4.98, -3.30)                                  |
| 35-49                                          | 45.2                          | 45.3         | 45.2         | 43.9         | 44.1         | 43.8         | 43.6         | 43.1         | 42.6         | <.001       | -2.62                                           |
|                                                | (44.7, 45.7)                  | (44.9, 45.7) | (44.7, 45.7) | (43.3, 44.5) | (43.5, 44.8) | (43.5, 44.1) | (42.8, 44.4) | (42.8, 43.3) | (42.0, 43.1) |             | (-3.35, -1.89)                                  |
| 50-64                                          | 43.5                          | 43.6         | 42.5         | 42.6         | 41.9         | 42.0         | 41.9         | 41.5         | 41.0         | <.001       | -2.43                                           |
|                                                | (43.1, 43.8)                  | (43.3, 44.0) | (42.0, 43.0) | (41.9, 43.2) | (41.5, 42.4) | (41.6, 42.4) | (41.5, 42.3) | (41.0, 42.1) | (40.3, 41.8) |             | (-3.24, -1.62)                                  |
| ≥65                                            | 42.5                          | 42.4         | 42.0         | 41.7         | 41.4         | 41.1         | 40.8         | 40.3         | 39.8         | <.001       | -2.75                                           |
|                                                | (42.2, 42.9)                  | (42.1, 42.8) | (41.4, 42.6) | (41.4, 42.0) | (41.1, 41.7) | (40.8, 41.5) | (40.3, 41.2) | (39.9, 40.7) | (39.3, 40.3) |             | (-3.41, -2.09)                                  |
| P for interaction                              |                               |              |              |              |              |              |              |              |              |             | <.001                                           |

| Estimated Percent Energy, %                    | Survey-Weighted Mean (95% CI) |                      |                      |                      |                      |                      |                      |                      |                      | P for Trend | 2015-2016 versus 1999-2000, Difference (95% CI) |
|------------------------------------------------|-------------------------------|----------------------|----------------------|----------------------|----------------------|----------------------|----------------------|----------------------|----------------------|-------------|-------------------------------------------------|
|                                                | 1999-2000                     | 2001-2002            | 2003-2004            | 2005-2006            | 2007-2008            | 2009-2010            | 2011-2012            | 2013-2014            | 2015-2016            |             |                                                 |
| <b>Sex</b>                                     |                               |                      |                      |                      |                      |                      |                      |                      |                      |             |                                                 |
| Male                                           | 45.0<br>(44.7, 45.2)          | 45.0<br>(44.7, 45.4) | 44.4<br>(44.0, 44.7) | 44.1<br>(43.6, 44.5) | 43.7<br>(43.3, 44.2) | 43.4<br>(43.1, 43.8) | 43.0<br>(42.7, 43.4) | 42.7<br>(42.4, 43.0) | 42.0<br>(41.5, 42.5) | <.001       | -3.00<br>(-3.55, -2.45)                         |
| Female                                         | 45.1<br>(44.8, 45.5)          | 45.0<br>(44.7, 45.4) | 44.5<br>(44.0, 45.0) | 43.6<br>(43.1, 44.0) | 43.7<br>(43.3, 44.2) | 43.5<br>(43.3, 43.8) | 43.1<br>(42.7, 43.5) | 42.5<br>(42.1, 42.9) | 41.7<br>(41.1, 42.3) | <.001       | -3.48<br>(-4.15, -2.80)                         |
| P for interaction                              |                               |                      |                      |                      | .36                  |                      |                      |                      |                      |             |                                                 |
| <b>Race/ethnicity</b>                          |                               |                      |                      |                      |                      |                      |                      |                      |                      |             |                                                 |
| Non-Hispanic white                             | 44.9<br>(44.6, 45.2)          | 44.8<br>(44.5, 45.1) | 44.1<br>(43.6, 44.5) | 43.3<br>(42.8, 43.7) | 43.5<br>(42.9, 44.1) | 43.0<br>(42.7, 43.4) | 42.8<br>(42.4, 43.1) | 42.3<br>(41.9, 42.7) | 41.5<br>(40.9, 42.0) | <.001       | -3.41<br>(-4.03, -2.80)                         |
| Non-Hispanic black                             | 46.4<br>(46.0, 46.7)          | 46.5<br>(46.1, 46.9) | 45.9<br>(45.2, 46.6) | 45.8<br>(45.1, 46.4) | 45.1<br>(44.8, 45.3) | 45.1<br>(44.7, 45.4) | 44.6<br>(44.1, 45.1) | 44.2<br>(43.7, 44.7) | 43.5<br>(43.0, 44.0) | <.001       | -2.85<br>(-3.47, -2.23)                         |
| Hispanic                                       | 45.0<br>(44.5, 45.5)          | 45.1<br>(44.6, 45.7) | 45.6<br>(45.1, 46.0) | 45.2<br>(44.6, 45.9) | 44.3<br>(44.0, 44.7) | 44.9<br>(44.5, 45.3) | 43.6<br>(43.0, 44.1) | 43.3<br>(42.8, 43.7) | 42.8<br>(42.3, 43.4) | <.001       | -2.14<br>(-2.88, -1.39)                         |
| Other                                          | 45.2<br>(44.5, 45.9)          | 45.2<br>(44.2, 46.3) | 43.8<br>(43.2, 44.5) | 43.7<br>(42.8, 44.5) | 42.6<br>(41.6, 43.6) | 42.6<br>(41.9, 43.3) | 42.5<br>(41.8, 43.3) | 41.4<br>(40.7, 42.0) | 40.7<br>(40.1, 41.2) | <.001       | -4.55<br>(-5.43, -3.66)                         |
| P for interaction                              |                               |                      |                      |                      | <.001                |                      |                      |                      |                      |             |                                                 |
| <b>Education level</b>                         |                               |                      |                      |                      |                      |                      |                      |                      |                      |             |                                                 |
| <High school graduate                          | 45.0<br>(44.6, 45.4)          | 45.3<br>(44.9, 45.6) | 45.2<br>(44.8, 45.6) | 44.7<br>(44.3, 45.1) | 44.2<br>(43.9, 44.6) | 44.5<br>(44.1, 45.0) | 44.2<br>(43.8, 44.5) | 43.9<br>(43.4, 44.5) | 43.4<br>(43.0, 43.9) | <.001       | -1.62<br>(-2.22, -1.02)                         |
| High school graduate or GED                    | 45.1<br>(44.7, 45.5)          | 45.2<br>(44.8, 45.6) | 44.8<br>(44.1, 45.4) | 44.6<br>(44.2, 45.1) | 44.4<br>(43.9, 44.9) | 44.6<br>(44.2, 45.0) | 43.6<br>(43.1, 44.1) | 43.6<br>(43.2, 43.9) | 43.0<br>(42.4, 43.7) | <.001       | -2.06<br>(-2.84, -1.29)                         |
| Some college or above                          | 45.1<br>(44.7, 45.5)          | 44.9<br>(44.6, 45.2) | 44.0<br>(43.6, 44.5) | 43.2<br>(42.6, 43.7) | 43.2<br>(42.8, 43.6) | 42.7<br>(42.5, 43.0) | 42.6<br>(42.2, 43.0) | 41.9<br>(41.5, 42.4) | 41.1<br>(40.6, 41.6) | <.001       | -3.99<br>(-4.64, -3.34)                         |
| P for interaction                              |                               |                      |                      |                      | <.001                |                      |                      |                      |                      |             |                                                 |
| <b>Ratio of family income to poverty level</b> |                               |                      |                      |                      |                      |                      |                      |                      |                      |             |                                                 |
| <1.30                                          | 45.9<br>(45.4, 46.4)          | 45.7<br>(45.4, 46.0) | 45.9<br>(45.4, 46.4) | 45.3<br>(44.7, 46.0) | 45.3<br>(44.7, 46.0) | 45.3<br>(45.0, 45.6) | 44.7<br>(44.1, 45.2) | 44.5<br>(44.1, 44.9) | 43.4<br>(43.1, 43.8) | <.001       | -2.46<br>(-3.11, -1.82)                         |
| 1.30-3.49                                      | 45.4<br>(45.1, 45.8)          | 45.4<br>(45.0, 45.7) | 44.5<br>(44.2, 44.9) | 44.3<br>(43.8, 44.8) | 43.7<br>(43.4, 44.0) | 43.9<br>(43.5, 44.4) | 43.3<br>(42.7, 43.8) | 42.7<br>(42.4, 43.0) | 42.4<br>(41.9, 42.8) | <.001       | -3.09<br>(-3.68, -2.50)                         |

| Estimated<br>Percent<br>Energy, % | Survey-Weighted Mean<br>(95% CI) |                      |                      |                      |                      |                      |                      |                      |                      | P for<br>Trend | 2015-2016<br>versus<br>1999-2000,<br>Difference<br>(95% CI) |
|-----------------------------------|----------------------------------|----------------------|----------------------|----------------------|----------------------|----------------------|----------------------|----------------------|----------------------|----------------|-------------------------------------------------------------|
|                                   | 1999-2000                        | 2001-2002            | 2003-2004            | 2005-2006            | 2007-2008            | 2009-2010            | 2011-2012            | 2013-2014            | 2015-2016            |                |                                                             |
| ≥3.50                             | 44.5<br>(44.1, 44.8)             | 44.5<br>(44.1, 45.0) | 43.5<br>(43.0, 44.0) | 42.8<br>(42.4, 43.2) | 43.0<br>(42.4, 43.7) | 42.1<br>(41.8, 42.5) | 41.9<br>(41.5, 42.2) | 41.4<br>(40.9, 41.8) | 40.6<br>(39.9, 41.3) | <.001          | -3.89<br>(-4.67, -3.11)                                     |
| P for interaction                 |                                  |                      |                      |                      | <.001                |                      |                      |                      |                      |                |                                                             |

Abbreviation: GED, general equivalency diploma; NHANES, National Health and Nutrition Examination Survey.

P for interaction was calculated with the survey-weighted Wald F test for an interaction term between 2-year survey cycle and demographic subgroups and statistical significance was set at a two-tailed P<.001.

**eTable 8. Trends in Estimated Percent Energy (%E) From Animal and Plant Protein by Age Group, Sex, Race/Ethnicity, Education, and Income, 1999-2016**

| Estimated Percent Energy, % | Survey-Weighted Mean (95% CI) |                      |                      |                      |                      |                      |                      |                      |                      | P for Trend | 2015-2016 versus 1999-2000, Difference (95% CI) |
|-----------------------------|-------------------------------|----------------------|----------------------|----------------------|----------------------|----------------------|----------------------|----------------------|----------------------|-------------|-------------------------------------------------|
|                             | 1999-2000                     | 2001-2002            | 2003-2004            | 2005-2006            | 2007-2008            | 2009-2010            | 2011-2012            | 2013-2014            | 2015-2016            |             |                                                 |
| <b>Animal protein</b>       |                               |                      |                      |                      |                      |                      |                      |                      |                      |             |                                                 |
| <b>Age group, y</b>         |                               |                      |                      |                      |                      |                      |                      |                      |                      |             |                                                 |
| 20-34                       | 10.1<br>(10.0, 10.2)          | 10.1<br>(9.96, 10.3) | 10.4<br>(10.1, 10.6) | 10.6<br>(10.4, 10.8) | 10.6<br>(10.5, 10.8) | 10.6<br>(10.4, 10.7) | 10.5<br>(10.4, 10.6) | 10.8<br>(10.7, 10.9) | 10.9<br>(10.7, 11.0) | <.001       | 0.75<br>(0.56, 0.94)                            |
| 35-49                       | 10.2<br>(10.0, 10.4)          | 10.1<br>(10.0, 10.2) | 10.1<br>(9.94, 10.2) | 10.5<br>(10.4, 10.7) | 10.5<br>(10.4, 10.6) | 10.5<br>(10.4, 10.6) | 10.4<br>(10.2, 10.6) | 10.6<br>(10.5, 10.7) | 10.7<br>(10.5, 10.8) | <.001       | 0.44<br>(0.20, 0.68)                            |
| 50-64                       | 10.2<br>(10.1, 10.3)          | 10.1<br>(10.1, 10.2) | 10.4<br>(10.3, 10.5) | 10.4<br>(10.3, 10.6) | 10.4<br>(10.3, 10.5) | 10.3<br>(10.1, 10.5) | 10.2<br>(10.1, 10.3) | 10.5<br>(10.3, 10.6) | 10.5<br>(10.3, 10.6) | <.001       | 0.30<br>(0.11, 0.49)                            |
| ≥65                         | 10.1<br>(10.0, 10.2)          | 10.0<br>(9.90, 10.2) | 10.2<br>(10.0, 10.3) | 10.1<br>(10.0, 10.3) | 10.3<br>(10.2, 10.4) | 10.3<br>(10.2, 10.4) | 10.3<br>(10.2, 10.3) | 10.3<br>(10.2, 10.4) | 10.3<br>(10.1, 10.5) | .005        | 0.20<br>(0.00, 0.41)                            |
| P for interaction           | <.001                         |                      |                      |                      |                      |                      |                      |                      |                      |             |                                                 |
| <b>Sex</b>                  |                               |                      |                      |                      |                      |                      |                      |                      |                      |             |                                                 |
| Male                        | 10.5<br>(10.4, 10.6)          | 10.4<br>(10.3, 10.5) | 10.6<br>(10.4, 10.7) | 10.7<br>(10.6, 10.8) | 10.8<br>(10.7, 10.9) | 10.8<br>(10.6, 10.9) | 10.7<br>(10.6, 10.8) | 10.9<br>(10.8, 11.0) | 10.9<br>(10.8, 11.0) | <.001       | 0.43<br>(0.28, 0.58)                            |
| Female                      | 9.88<br>(9.79, 9.97)          | 9.82<br>(9.73, 9.91) | 9.98<br>(9.85, 10.1) | 10.3<br>(10.2, 10.3) | 10.2<br>(10.1, 10.3) | 10.1<br>(10.0, 10.3) | 10.0<br>(9.94, 10.1) | 10.3<br>(10.2, 10.4) | 10.3<br>(10.2, 10.4) | <.001       | 0.44<br>(0.30, 0.57)                            |
| P for interaction           | .92                           |                      |                      |                      |                      |                      |                      |                      |                      |             |                                                 |
| <b>Race/ethnicity</b>       |                               |                      |                      |                      |                      |                      |                      |                      |                      |             |                                                 |
| Non-Hispanic white          | 10.1<br>(10.0, 10.1)          | 10.0<br>(9.96, 10.1) | 10.2<br>(10.1, 10.3) | 10.4<br>(10.3, 10.5) | 10.4<br>(10.3, 10.5) | 10.4<br>(10.2, 10.5) | 10.2<br>(10.1, 10.4) | 10.5<br>(10.4, 10.6) | 10.5<br>(10.4, 10.6) | <.001       | 0.45<br>(0.32, 0.58)                            |
| Non-Hispanic black          | 10.2<br>(10.1, 10.3)          | 10.0<br>(9.90, 10.1) | 10.3<br>(10.1, 10.6) | 10.4<br>(10.2, 10.5) | 10.5<br>(10.4, 10.5) | 10.4<br>(10.3, 10.6) | 10.3<br>(10.3, 10.4) | 10.4<br>(10.3, 10.5) | 10.6<br>(10.5, 10.7) | .001        | 0.40<br>(0.21, 0.59)                            |
| Hispanic                    | 10.5<br>(10.3, 10.6)          | 10.5<br>(10.3, 10.6) | 10.5<br>(10.3, 10.7) | 10.7<br>(10.5, 10.8) | 10.8<br>(10.7, 10.9) | 10.7<br>(10.5, 10.8) | 10.7<br>(10.6, 10.8) | 10.7<br>(10.6, 10.9) | 10.7<br>(10.6, 10.9) | <.001       | 0.28<br>(0.06, 0.50)                            |
| Other                       | 10.8<br>(10.5, 11.1)          | 10.5<br>(10.3, 10.7) | 10.8<br>(10.5, 11.1) | 10.8<br>(10.6, 11.0) | 11.0<br>(10.7, 11.2) | 10.9<br>(10.6, 11.2) | 10.7<br>(10.5, 10.8) | 10.9<br>(10.7, 11.1) | 11.0<br>(10.8, 11.2) | .02         | 0.26                                            |

|                                                | Survey-Weighted Mean<br>(95% CI) |                      |                      |                      |                      |                      |                      |                      |                      | P for<br>Trend | 2015-2016<br>versus<br>1999-2000,<br>Difference<br>(95% CI) |
|------------------------------------------------|----------------------------------|----------------------|----------------------|----------------------|----------------------|----------------------|----------------------|----------------------|----------------------|----------------|-------------------------------------------------------------|
| Estimated<br>Percent<br>Energy, %              | 1999-2000                        | 2001-2002            | 2003-2004            | 2005-2006            | 2007-2008            | 2009-2010            | 2011-2012            | 2013-2014            | 2015-2016            |                |                                                             |
|                                                |                                  |                      |                      |                      |                      |                      |                      |                      |                      |                | (-0.09,<br>0.61)                                            |
| P for interaction                              | .09                              |                      |                      |                      |                      |                      |                      |                      |                      |                |                                                             |
| <b>Education level</b>                         |                                  |                      |                      |                      |                      |                      |                      |                      |                      |                |                                                             |
| <High school<br>graduate                       | 10.4<br>(10.3, 10.5)             | 10.3<br>(10.2, 10.4) | 10.5<br>(10.3, 10.6) | 10.5<br>(10.4, 10.7) | 10.7<br>(10.6, 10.8) | 10.6<br>(10.5, 10.7) | 10.5<br>(10.3, 10.6) | 10.5<br>(10.4, 10.7) | 10.7<br>(10.6, 10.8) | <.001          | 0.28<br>(0.14, 0.43)                                        |
| High school<br>graduate or GED                 | 10.1<br>(10.0, 10.2)             | 10.1<br>(9.93, 10.2) | 10.1<br>(9.95, 10.3) | 10.3<br>(10.2, 10.4) | 10.4<br>(10.3, 10.6) | 10.4<br>(10.3, 10.5) | 10.5<br>(10.3, 10.6) | 10.6<br>(10.5, 10.7) | 10.6<br>(10.4, 10.8) | <.001          | 0.47<br>(0.24, 0.71)                                        |
| Some college or<br>above                       | 10.1<br>(10.00,<br>10.2)         | 10.1<br>(9.99, 10.2) | 10.3<br>(10.1, 10.4) | 10.5<br>(10.4, 10.6) | 10.4<br>(10.3, 10.5) | 10.4<br>(10.3, 10.6) | 10.3<br>(10.2, 10.4) | 10.6<br>(10.5, 10.6) | 10.6<br>(10.5, 10.7) | <.001          | 0.51<br>(0.39, 0.63)                                        |
| P for interaction                              | .004                             |                      |                      |                      |                      |                      |                      |                      |                      |                |                                                             |
| <b>Ratio of family income to poverty level</b> |                                  |                      |                      |                      |                      |                      |                      |                      |                      |                |                                                             |
| <1.30                                          | 10.2<br>(10.0, 10.3)             | 10.2<br>(10.1, 10.3) | 10.1<br>(9.94, 10.3) | 10.4<br>(10.2, 10.6) | 10.5<br>(10.4, 10.6) | 10.5<br>(10.4, 10.6) | 10.4<br>(10.3, 10.5) | 10.6<br>(10.4, 10.7) | 10.7<br>(10.6, 10.8) | <.001          | 0.54<br>(0.35, 0.74)                                        |
| 1.30-3.49                                      | 10.1<br>(10.0, 10.2)             | 10.1<br>(10.0, 10.2) | 10.3<br>(10.1, 10.4) | 10.4<br>(10.3, 10.5) | 10.5<br>(10.4, 10.6) | 10.4<br>(10.2, 10.6) | 10.3<br>(10.1, 10.4) | 10.5<br>(10.4, 10.7) | 10.5<br>(10.4, 10.6) | <.001          | 0.41<br>(0.27, 0.55)                                        |
| ≥3.50                                          | 10.2<br>(10.1, 10.3)             | 10.1<br>(9.97, 10.2) | 10.3<br>(10.2, 10.5) | 10.5<br>(10.4, 10.6) | 10.4<br>(10.2, 10.5) | 10.5<br>(10.4, 10.6) | 10.3<br>(10.2, 10.5) | 10.6<br>(10.5, 10.7) | 10.6<br>(10.4, 10.8) | <.001          | 0.41<br>(0.21, 0.61)                                        |
| P for interaction                              | .05                              |                      |                      |                      |                      |                      |                      |                      |                      |                |                                                             |
| <b>Plant protein</b>                           |                                  |                      |                      |                      |                      |                      |                      |                      |                      |                |                                                             |
| <b>Age group, y</b>                            |                                  |                      |                      |                      |                      |                      |                      |                      |                      |                |                                                             |
| 20-34                                          | 5.08<br>(4.99, 5.16)             | 5.14<br>(5.07, 5.21) | 5.21<br>(5.08, 5.33) | 5.30<br>(5.22, 5.37) | 5.33<br>(5.24, 5.41) | 5.38<br>(5.32, 5.45) | 5.49<br>(5.40, 5.58) | 5.46<br>(5.38, 5.54) | 5.59<br>(5.45, 5.73) | <.001          | 0.51<br>(0.35, 0.68)                                        |
| 35-49                                          | 5.32<br>(5.25, 5.39)             | 5.39<br>(5.34, 5.43) | 5.39<br>(5.31, 5.47) | 5.53<br>(5.46, 5.59) | 5.50<br>(5.42, 5.59) | 5.65<br>(5.60, 5.71) | 5.66<br>(5.55, 5.77) | 5.73<br>(5.68, 5.78) | 5.70<br>(5.61, 5.79) | <.001          | 0.38<br>(0.26, 0.50)                                        |
| 50-64                                          | 5.55<br>(5.46, 5.65)             | 5.62<br>(5.53, 5.71) | 5.73<br>(5.64, 5.82) | 5.71<br>(5.63, 5.78) | 5.74<br>(5.65, 5.84) | 5.84<br>(5.78, 5.91) | 5.90<br>(5.83, 5.97) | 5.83<br>(5.74, 5.91) | 5.83<br>(5.68, 5.98) | <.001          | 0.28<br>(0.10, 0.45)                                        |

|                                   | Survey-Weighted Mean<br>(95% CI) |                      |                      |                      |                      |                      |                      |                      |                      | P for<br>Trend | 2015-2016<br>versus<br>1999-2000,<br>Difference<br>(95% CI) |
|-----------------------------------|----------------------------------|----------------------|----------------------|----------------------|----------------------|----------------------|----------------------|----------------------|----------------------|----------------|-------------------------------------------------------------|
| Estimated<br>Percent<br>Energy, % | 1999-2000                        | 2001-2002            | 2003-2004            | 2005-2006            | 2007-2008            | 2009-2010            | 2011-2012            | 2013-2014            | 2015-2016            |                |                                                             |
| ≥65                               | 5.76<br>(5.70, 5.82)             | 5.85<br>(5.79, 5.90) | 5.83<br>(5.79, 5.88) | 5.89<br>(5.84, 5.94) | 5.91<br>(5.85, 5.98) | 5.94<br>(5.89, 5.99) | 6.01<br>(5.95, 6.07) | 6.00<br>(5.93, 6.07) | 5.97<br>(5.90, 6.03) | <.001          | 0.21<br>(0.12, 0.29)                                        |
| P for interaction                 | .002                             |                      |                      |                      |                      |                      |                      |                      |                      |                |                                                             |
| <b>Sex</b>                        |                                  |                      |                      |                      |                      |                      |                      |                      |                      |                |                                                             |
| Male                              | 5.32<br>(5.28, 5.37)             | 5.36<br>(5.30, 5.42) | 5.46<br>(5.39, 5.53) | 5.46<br>(5.39, 5.53) | 5.51<br>(5.44, 5.58) | 5.62<br>(5.57, 5.66) | 5.67<br>(5.62, 5.73) | 5.69<br>(5.64, 5.74) | 5.70<br>(5.60, 5.81) | <.001          | 0.38<br>(0.27, 0.50)                                        |
| Female                            | 5.42<br>(5.34, 5.50)             | 5.53<br>(5.47, 5.60) | 5.53<br>(5.44, 5.62) | 5.67<br>(5.63, 5.72) | 5.65<br>(5.59, 5.72) | 5.73<br>(5.70, 5.76) | 5.81<br>(5.75, 5.87) | 5.77<br>(5.71, 5.82) | 5.81<br>(5.72, 5.90) | <.001          | 0.39<br>(0.26, 0.51)                                        |
| P for interaction                 | .97                              |                      |                      |                      |                      |                      |                      |                      |                      |                |                                                             |
| <b>Race/ethnicity</b>             |                                  |                      |                      |                      |                      |                      |                      |                      |                      |                |                                                             |
| Non-Hispanic<br>white             | 5.34<br>(5.27, 5.41)             | 5.43<br>(5.38, 5.48) | 5.51<br>(5.43, 5.59) | 5.58<br>(5.54, 5.62) | 5.57<br>(5.49, 5.65) | 5.67<br>(5.63, 5.71) | 5.72<br>(5.66, 5.77) | 5.69<br>(5.62, 5.75) | 5.73<br>(5.64, 5.83) | <.001          | 0.40<br>(0.28, 0.52)                                        |
| Non-Hispanic<br>black             | 5.21<br>(5.14, 5.28)             | 5.23<br>(5.20, 5.27) | 5.15<br>(5.06, 5.23) | 5.22<br>(5.09, 5.35) | 5.26<br>(5.20, 5.33) | 5.33<br>(5.26, 5.39) | 5.41<br>(5.32, 5.51) | 5.41<br>(5.35, 5.47) | 5.39<br>(5.30, 5.48) | <.001          | 0.18<br>(0.07, 0.29)                                        |
| Hispanic                          | 5.57<br>(5.50, 5.63)             | 5.56<br>(5.49, 5.64) | 5.55<br>(5.48, 5.62) | 5.63<br>(5.58, 5.68) | 5.69<br>(5.63, 5.75) | 5.74<br>(5.68, 5.80) | 5.83<br>(5.76, 5.90) | 5.84<br>(5.72, 5.96) | 5.79<br>(5.72, 5.85) | <.001          | 0.22<br>(0.13, 0.31)                                        |
| Other                             | 5.71<br>(5.52, 5.90)             | 6.03<br>(5.66, 6.40) | 5.98<br>(5.80, 6.16) | 6.03<br>(5.80, 6.27) | 6.19<br>(6.03, 6.35) | 6.24<br>(5.98, 6.50) | 6.29<br>(6.18, 6.40) | 6.33<br>(6.17, 6.48) | 6.31<br>(6.15, 6.47) | <.001          | 0.60<br>(0.35, 0.85)                                        |
| P for interaction                 | <.001                            |                      |                      |                      |                      |                      |                      |                      |                      |                |                                                             |
| <b>Education level</b>            |                                  |                      |                      |                      |                      |                      |                      |                      |                      |                |                                                             |
| <High school<br>graduate          | 5.44<br>(5.36, 5.51)             | 5.44<br>(5.35, 5.52) | 5.48<br>(5.41, 5.55) | 5.50<br>(5.41, 5.59) | 5.59<br>(5.49, 5.68) | 5.64<br>(5.57, 5.71) | 5.63<br>(5.53, 5.72) | 5.61<br>(5.52, 5.71) | 5.64<br>(5.53, 5.75) | <.001          | 0.20<br>(0.07, 0.33)                                        |
| High school<br>graduate or GED    | 5.29<br>(5.20, 5.38)             | 5.37<br>(5.28, 5.46) | 5.36<br>(5.27, 5.45) | 5.48<br>(5.40, 5.56) | 5.45<br>(5.36, 5.53) | 5.49<br>(5.44, 5.54) | 5.59<br>(5.51, 5.68) | 5.58<br>(5.50, 5.65) | 5.55<br>(5.46, 5.64) | <.001          | 0.26<br>(0.14, 0.39)                                        |
| Some college<br>or above          | 5.39<br>(5.33, 5.45)             | 5.49<br>(5.45, 5.54) | 5.56<br>(5.49, 5.64) | 5.64<br>(5.57, 5.70) | 5.65<br>(5.59, 5.71) | 5.76<br>(5.71, 5.80) | 5.82<br>(5.76, 5.87) | 5.81<br>(5.76, 5.86) | 5.85<br>(5.76, 5.95) | <.001          | 0.46<br>(0.35, 0.57)                                        |
| P for interaction                 | <.001                            |                      |                      |                      |                      |                      |                      |                      |                      |                |                                                             |

| Estimated Percent Energy, %                    | Survey-Weighted Mean (95% CI) |                      |                      |                      |                      |                      |                      |                      |                      | P for Trend | 2015-2016 versus 1999-2000, Difference (95% CI) |
|------------------------------------------------|-------------------------------|----------------------|----------------------|----------------------|----------------------|----------------------|----------------------|----------------------|----------------------|-------------|-------------------------------------------------|
|                                                | 1999-2000                     | 2001-2002            | 2003-2004            | 2005-2006            | 2007-2008            | 2009-2010            | 2011-2012            | 2013-2014            | 2015-2016            |             |                                                 |
| <b>Ratio of family income to poverty level</b> |                               |                      |                      |                      |                      |                      |                      |                      |                      |             |                                                 |
| <1.30                                          | 5.34<br>(5.25, 5.43)          | 5.38<br>(5.29, 5.48) | 5.37<br>(5.27, 5.47) | 5.40<br>(5.29, 5.50) | 5.47<br>(5.35, 5.60) | 5.51<br>(5.45, 5.57) | 5.56<br>(5.46, 5.65) | 5.51<br>(5.43, 5.58) | 5.61<br>(5.46, 5.77) | .002        | 0.27<br>(0.10, 0.45)                            |
| 1.30-3.49                                      | 5.32<br>(5.25, 5.39)          | 5.40<br>(5.35, 5.45) | 5.48<br>(5.41, 5.56) | 5.54<br>(5.47, 5.61) | 5.58<br>(5.53, 5.63) | 5.63<br>(5.59, 5.67) | 5.73<br>(5.67, 5.78) | 5.68<br>(5.60, 5.77) | 5.68<br>(5.60, 5.77) | <.001       | 0.36<br>(0.25, 0.47)                            |
| ≥3.50                                          | 5.42<br>(5.35, 5.50)          | 5.49<br>(5.44, 5.54) | 5.58<br>(5.50, 5.65) | 5.66<br>(5.59, 5.73) | 5.62<br>(5.53, 5.70) | 5.80<br>(5.75, 5.85) | 5.88<br>(5.81, 5.95) | 5.90<br>(5.84, 5.95) | 5.89<br>(5.78, 6.00) | <.001       | 0.47<br>(0.33, 0.60)                            |
| P for interaction                              | <.001                         |                      |                      |                      |                      |                      |                      |                      |                      |             |                                                 |

Abbreviation: GED, general equivalency diploma; NHANES, National Health and Nutrition Examination Survey.

P for interaction was calculated with the survey-weighted Wald F test for an interaction term between 2-year survey cycle and demographic subgroups and statistical significance was set at a two-tailed P<.001.

**eTable 9. Trends in Estimated Percent Energy (%E) From Saturated Fatty Acids, Monounsaturated Fatty Acids, and Polyunsaturated Fatty Acids by Age Group, Sex, Race/Ethnicity, Education, and Income, 1999-2016**

|                                   | Survey-Weighted Mean<br>(95% CI) |                      |                      |                      |                      |                      |                      |                      |                      | P for<br>Trend | 2015-2016<br>versus<br>1999-2000,<br>Difference<br>(95% CI) |
|-----------------------------------|----------------------------------|----------------------|----------------------|----------------------|----------------------|----------------------|----------------------|----------------------|----------------------|----------------|-------------------------------------------------------------|
| Estimated<br>Percent<br>Energy, % | 1999-2000                        | 2001-2002            | 2003-2004            | 2005-2006            | 2007-2008            | 2009-2010            | 2011-2012            | 2013-2014            | 2015-2016            |                |                                                             |
| <b>Saturated fatty acids</b>      |                                  |                      |                      |                      |                      |                      |                      |                      |                      |                |                                                             |
| Age group, y                      |                                  |                      |                      |                      |                      |                      |                      |                      |                      |                |                                                             |
| 20-34                             | 11.5<br>(11.4, 11.6)             | 11.5<br>(11.3, 11.6) | 11.6<br>(11.4, 11.9) | 11.7<br>(11.5, 11.9) | 11.4<br>(11.2, 11.6) | 11.3<br>(11.1, 11.4) | 11.4<br>(11.2, 11.6) | 11.7<br>(11.6, 11.9) | 11.9<br>(11.7, 12.0) | <.001          | 0.33<br>(0.15, 0.51)                                        |
| 35-49                             | 11.7<br>(11.6, 11.8)             | 11.6<br>(11.5, 11.8) | 11.7<br>(11.5, 12.0) | 11.9<br>(11.7, 12.1) | 11.8<br>(11.6, 12.0) | 11.5<br>(11.4, 11.7) | 11.5<br>(11.3, 11.6) | 11.6<br>(11.4, 11.7) | 11.8<br>(11.6, 12.0) | .005           | 0.10<br>(-0.16, 0.35)                                       |
| 50-64                             | 11.5<br>(11.3, 11.7)             | 11.4<br>(11.2, 11.6) | 11.8<br>(11.6, 12.0) | 11.8<br>(11.6, 12.0) | 11.6<br>(11.4, 11.8) | 11.6<br>(11.4, 11.8) | 11.5<br>(11.3, 11.6) | 11.7<br>(11.5, 11.9) | 11.9<br>(11.7, 12.1) | .002           | 0.38<br>(0.10, 0.66)                                        |
| ≥65                               | 11.1<br>(11.0, 11.3)             | 11.1<br>(11.0, 11.2) | 11.2<br>(11.0, 11.4) | 11.4<br>(11.2, 11.5) | 11.2<br>(11.1, 11.4) | 11.3<br>(11.2, 11.4) | 11.1<br>(10.9, 11.3) | 11.5<br>(11.4, 11.7) | 11.9<br>(11.8, 12.1) | <.001          | 0.77<br>(0.58, 0.97)                                        |
| P for interaction                 | <.001                            |                      |                      |                      |                      |                      |                      |                      |                      |                |                                                             |
| Sex                               |                                  |                      |                      |                      |                      |                      |                      |                      |                      |                |                                                             |
| Male                              | 11.7<br>(11.6, 11.8)             | 11.7<br>(11.6, 11.8) | 11.8<br>(11.7, 12.0) | 11.9<br>(11.8, 12.0) | 11.8<br>(11.6, 11.9) | 11.7<br>(11.5, 11.9) | 11.6<br>(11.5, 11.8) | 11.8<br>(11.7, 12.0) | 12.0<br>(11.9, 12.2) | <.001          | 0.30<br>(0.15, 0.46)                                        |
| Female                            | 11.3<br>(11.2, 11.4)             | 11.2<br>(11.1, 11.3) | 11.4<br>(11.2, 11.6) | 11.5<br>(11.4, 11.7) | 11.4<br>(11.2, 11.5) | 11.2<br>(11.1, 11.3) | 11.2<br>(11.0, 11.3) | 11.5<br>(11.3, 11.6) | 11.7<br>(11.6, 11.8) | <.001          | 0.40<br>(0.20, 0.60)                                        |
| P for interaction                 | .88                              |                      |                      |                      |                      |                      |                      |                      |                      |                |                                                             |
| Race/ethnicity                    |                                  |                      |                      |                      |                      |                      |                      |                      |                      |                |                                                             |
| Non-Hispanic white                | 11.9<br>(11.8, 12.0)             | 11.7<br>(11.6, 11.8) | 11.9<br>(11.8, 12.1) | 12.0<br>(11.9, 12.2) | 11.9<br>(11.8, 12.0) | 11.8<br>(11.7, 11.9) | 11.7<br>(11.6, 11.9) | 12.0<br>(11.9, 12.1) | 12.3<br>(12.2, 12.4) | <.001          | 0.45<br>(0.32, 0.59)                                        |
| Non-Hispanic black                | 11.0<br>(10.9, 11.1)             | 11.0<br>(10.8, 11.1) | 11.2<br>(11.0, 11.4) | 11.2<br>(11.0, 11.4) | 11.2<br>(11.1, 11.3) | 11.1<br>(11.0, 11.3) | 11.1<br>(11.0, 11.3) | 11.3<br>(11.1, 11.5) | 11.4<br>(11.3, 11.6) | .001           | 0.44<br>(0.22, 0.65)                                        |
| Hispanic                          | 10.7<br>(10.5, 10.9)             | 10.8<br>(10.6, 11.0) | 10.6<br>(10.4, 10.8) | 10.6<br>(10.5, 10.8) | 10.7<br>(10.5, 10.8) | 10.5<br>(10.4, 10.6) | 10.8<br>(10.6, 11.0) | 10.9<br>(10.8, 11.1) | 11.1<br>(11.0, 11.2) | <.001          | 0.38<br>(0.15, 0.61)                                        |
| Other                             | 9.96<br>(9.46, 10.5)             | 9.76<br>(9.33, 10.2) | 10.2<br>(9.83, 10.6) | 10.6<br>(10.2, 10.9) | 10.1<br>(9.75, 10.4) | 10.1<br>(9.80, 10.4) | 9.84<br>(9.68, 10.0) | 10.3<br>(10.1, 10.5) | 10.6<br>(10.3, 10.8) | <.001          | 0.60<br>(0.03, 1.16)                                        |



|                                                | Survey-Weighted Mean<br>(95% CI) |                      |                      |                      |                      |                      |                      |                      |                      | P for<br>Trend | 2015-2016<br>versus<br>1999-2000,<br>Difference<br>(95% CI) |
|------------------------------------------------|----------------------------------|----------------------|----------------------|----------------------|----------------------|----------------------|----------------------|----------------------|----------------------|----------------|-------------------------------------------------------------|
| Estimated<br>Percent<br>Energy, %              | 1999-2000                        | 2001-2002            | 2003-2004            | 2005-2006            | 2007-2008            | 2009-2010            | 2011-2012            | 2013-2014            | 2015-2016            |                |                                                             |
| P for interaction                              | .01                              |                      |                      |                      |                      |                      |                      |                      |                      |                |                                                             |
| <b>Education level</b>                         |                                  |                      |                      |                      |                      |                      |                      |                      |                      |                |                                                             |
| <High school graduate                          | 11.2<br>(11.1, 11.4)             | 11.2<br>(11.0, 11.4) | 11.1<br>(10.9, 11.3) | 11.3<br>(11.1, 11.5) | 11.3<br>(11.0, 11.6) | 11.1<br>(10.8, 11.3) | 11.0<br>(10.8, 11.2) | 11.3<br>(11.2, 11.5) | 11.4<br>(11.2, 11.6) | .14            | 0.16<br>(-0.10, 0.43)                                       |
| High school graduate or GED                    | 11.7<br>(11.6, 11.8)             | 11.6<br>(11.5, 11.7) | 11.9<br>(11.7, 12.0) | 11.7<br>(11.5, 11.8) | 11.5<br>(11.4, 11.7) | 11.5<br>(11.4, 11.7) | 11.4<br>(11.2, 11.6) | 11.7<br>(11.5, 11.9) | 11.9<br>(11.6, 12.2) | .008           | 0.22<br>(-0.07, 0.50)                                       |
| Some college or above                          | 11.6<br>(11.5, 11.7)             | 11.4<br>(11.3, 11.6) | 11.7<br>(11.5, 11.9) | 11.9<br>(11.7, 12.0) | 11.7<br>(11.5, 11.8) | 11.5<br>(11.4, 11.7) | 11.5<br>(11.4, 11.6) | 11.7<br>(11.6, 11.8) | 12.0<br>(11.9, 12.0) | <.001          | 0.40<br>(0.27, 0.53)                                        |
| P for interaction                              | .002                             |                      |                      |                      |                      |                      |                      |                      |                      |                |                                                             |
| <b>Ratio of family income to poverty level</b> |                                  |                      |                      |                      |                      |                      |                      |                      |                      |                |                                                             |
| <1.30                                          | 11.1<br>(11.0, 11.3)             | 11.2<br>(11.0, 11.4) | 11.3<br>(11.1, 11.6) | 11.4<br>(11.2, 11.5) | 11.2<br>(10.9, 11.4) | 11.1<br>(11.0, 11.3) | 11.3<br>(11.1, 11.5) | 11.4<br>(11.3, 11.5) | 11.5<br>(11.2, 11.7) | .08            | 0.34<br>(0.07, 0.61)                                        |
| 1.30-3.49                                      | 11.5<br>(11.3, 11.7)             | 11.4<br>(11.3, 11.5) | 11.5<br>(11.3, 11.7) | 11.7<br>(11.4, 11.9) | 11.6<br>(11.3, 11.8) | 11.4<br>(11.3, 11.5) | 11.4<br>(11.2, 11.5) | 11.7<br>(11.5, 11.8) | 12.0<br>(11.8, 12.2) | <.001          | 0.48<br>(0.23, 0.73)                                        |
| ≥3.50                                          | 11.7<br>(11.6, 11.9)             | 11.6<br>(11.5, 11.7) | 11.9<br>(11.7, 12.0) | 11.9<br>(11.8, 12.1) | 11.8<br>(11.6, 11.9) | 11.7<br>(11.5, 11.9) | 11.5<br>(11.4, 11.7) | 11.8<br>(11.6, 11.9) | 12.0<br>(11.9, 12.1) | <.001          | 0.32<br>(0.15, 0.49)                                        |
| P for interaction                              | .28                              |                      |                      |                      |                      |                      |                      |                      |                      |                |                                                             |
| <b>Monounsaturated fatty acids</b>             |                                  |                      |                      |                      |                      |                      |                      |                      |                      |                |                                                             |
| <b>Age group, y</b>                            |                                  |                      |                      |                      |                      |                      |                      |                      |                      |                |                                                             |
| 20-34                                          | 12.8<br>(12.6, 12.9)             | 12.7<br>(12.6, 12.8) | 13.0<br>(12.8, 13.1) | 12.8<br>(12.7, 13.0) | 12.6<br>(12.5, 12.7) | 12.5<br>(12.4, 12.6) | 12.6<br>(12.5, 12.7) | 12.7<br>(12.6, 12.8) | 13.0<br>(12.8, 13.1) | <.001          | 0.20<br>(0.00, 0.41)                                        |
| 35-49                                          | 13.1<br>(12.9, 13.2)             | 13.0<br>(12.9, 13.2) | 13.1<br>(12.9, 13.3) | 13.1<br>(12.9, 13.3) | 13.1<br>(12.9, 13.3) | 12.7<br>(12.6, 12.9) | 12.7<br>(12.6, 12.9) | 12.8<br>(12.7, 12.9) | 13.0<br>(12.8, 13.2) | <.001          | -0.07<br>(-0.30, 0.16)                                      |
| 50-64                                          | 13.0<br>(12.8, 13.2)             | 12.9<br>(12.7, 13.0) | 13.3<br>(13.1, 13.6) | 13.1<br>(12.9, 13.3) | 13.1<br>(12.9, 13.3) | 12.9<br>(12.7, 13.1) | 12.9<br>(12.7, 13.0) | 13.0<br>(12.8, 13.2) | 13.3<br>(13.0, 13.5) | .03            | 0.29<br>(-0.07, 0.64)                                       |
| ≥65                                            | 12.6<br>(12.5, 12.8)             | 12.6<br>(12.5, 12.7) | 12.7<br>(12.5, 12.9) | 12.6<br>(12.5, 12.7) | 12.6<br>(12.4, 12.8) | 12.6<br>(12.4, 12.7) | 12.5<br>(12.4, 12.7) | 12.8<br>(12.6, 12.9) | 13.0<br>(12.9, 13.2) | .001           | 0.43<br>(0.19, 0.66)                                        |
| P for interaction                              | .003                             |                      |                      |                      |                      |                      |                      |                      |                      |                |                                                             |

|                                                | Survey-Weighted Mean<br>(95% CI) |                      |                      |                      |                      |                      |                      |                      |                      | P for<br>Trend | 2015-2016<br>versus<br>1999-2000,<br>Difference<br>(95% CI) |
|------------------------------------------------|----------------------------------|----------------------|----------------------|----------------------|----------------------|----------------------|----------------------|----------------------|----------------------|----------------|-------------------------------------------------------------|
| Estimated<br>Percent<br>Energy, %              | 1999-2000                        | 2001-2002            | 2003-2004            | 2005-2006            | 2007-2008            | 2009-2010            | 2011-2012            | 2013-2014            | 2015-2016            |                |                                                             |
| <b>Sex</b>                                     |                                  |                      |                      |                      |                      |                      |                      |                      |                      |                |                                                             |
| Male                                           | 13.3<br>(13.1, 13.4)             | 13.2<br>(13.1, 13.3) | 13.4<br>(13.2, 13.5) | 13.3<br>(13.2, 13.4) | 13.3<br>(13.2, 13.4) | 13.1<br>(13.0, 13.2) | 13.0<br>(12.9, 13.2) | 13.1<br>(13.0, 13.2) | 13.3<br>(13.2, 13.4) | .001           | 0.03<br>(-0.16, 0.22)                                       |
| Female                                         | 12.5<br>(12.4, 12.6)             | 12.5<br>(12.4, 12.6) | 12.7<br>(12.6, 12.9) | 12.6<br>(12.5, 12.7) | 12.5<br>(12.4, 12.6) | 12.3<br>(12.2, 12.4) | 12.3<br>(12.2, 12.5) | 12.6<br>(12.4, 12.7) | 12.9<br>(12.6, 13.1) | <.001          | 0.34<br>(0.10, 0.57)                                        |
| P for interaction                              | .02                              |                      |                      |                      |                      |                      |                      |                      |                      |                |                                                             |
| <b>Race/ethnicity</b>                          |                                  |                      |                      |                      |                      |                      |                      |                      |                      |                |                                                             |
| Non-Hispanic<br>white                          | 13.1<br>(13.0, 13.2)             | 13.0<br>(12.9, 13.1) | 13.2<br>(13.1, 13.4) | 13.1<br>(13.0, 13.2) | 13.1<br>(12.9, 13.2) | 12.9<br>(12.8, 13.0) | 12.9<br>(12.7, 13.0) | 13.1<br>(13.0, 13.2) | 13.3<br>(13.2, 13.5) | <.001          | 0.22<br>(0.04, 0.39)                                        |
| Non-Hispanic<br>black                          | 12.6<br>(12.4, 12.7)             | 12.8<br>(12.6, 12.9) | 13.0<br>(12.8, 13.2) | 12.7<br>(12.5, 13.0) | 12.9<br>(12.8, 13.0) | 12.7<br>(12.6, 12.8) | 12.7<br>(12.6, 12.9) | 12.8<br>(12.6, 13.0) | 13.0<br>(12.8, 13.1) | <.001          | 0.40<br>(0.21, 0.59)                                        |
| Hispanic                                       | 12.3<br>(12.1, 12.5)             | 12.4<br>(12.2, 12.6) | 12.2<br>(12.0, 12.5) | 12.3<br>(12.0, 12.5) | 12.2<br>(12.1, 12.4) | 12.0<br>(11.9, 12.1) | 12.3<br>(12.0, 12.5) | 12.2<br>(12.1, 12.4) | 12.4<br>(12.3, 12.6) | <.001          | 0.14<br>(-0.13, 0.40)                                       |
| Other                                          | 11.9<br>(11.4, 12.3)             | 11.4<br>(10.8, 12.0) | 12.2<br>(12.0, 12.5) | 12.1<br>(11.7, 12.5) | 11.9<br>(11.6, 12.1) | 11.8<br>(11.5, 12.0) | 11.7<br>(11.5, 11.9) | 12.0<br>(11.9, 12.2) | 12.4<br>(12.1, 12.7) | <.001          | 0.57<br>(0.01, 1.13)                                        |
| P for interaction                              | .02                              |                      |                      |                      |                      |                      |                      |                      |                      |                |                                                             |
| <b>Education level</b>                         |                                  |                      |                      |                      |                      |                      |                      |                      |                      |                |                                                             |
| <High school<br>graduate                       | 12.7<br>(12.5, 12.9)             | 12.6<br>(12.5, 12.8) | 12.5<br>(12.3, 12.8) | 12.6<br>(12.4, 12.7) | 12.7<br>(12.5, 12.9) | 12.3<br>(12.2, 12.5) | 12.4<br>(12.3, 12.6) | 12.4<br>(12.3, 12.6) | 12.5<br>(12.3, 12.6) | .05            | -0.21<br>(-0.44, 0.02)                                      |
| High school<br>graduate or GED                 | 13.0<br>(12.8, 13.2)             | 13.0<br>(12.9, 13.1) | 13.2<br>(13.1, 13.4) | 12.9<br>(12.7, 13.0) | 12.9<br>(12.7, 13.0) | 12.7<br>(12.6, 12.9) | 12.7<br>(12.5, 13.0) | 12.8<br>(12.6, 12.9) | 13.0<br>(12.8, 13.1) | <.001          | -0.05<br>(-0.29, 0.19)                                      |
| Some college<br>or above                       | 12.9<br>(12.8, 13.0)             | 12.8<br>(12.7, 13.0) | 13.1<br>(12.9, 13.3) | 13.1<br>(12.9, 13.2) | 13.0<br>(12.8, 13.1) | 12.8<br>(12.7, 12.9) | 12.7<br>(12.6, 12.8) | 12.9<br>(12.8, 13.0) | 13.2<br>(13.1, 13.4) | <.001          | 0.33<br>(0.12, 0.54)                                        |
| P for interaction                              | <.001                            |                      |                      |                      |                      |                      |                      |                      |                      |                |                                                             |
| <b>Ratio of family income to poverty level</b> |                                  |                      |                      |                      |                      |                      |                      |                      |                      |                |                                                             |
| <1.30                                          | 12.6<br>(12.4, 12.7)             | 12.7<br>(12.5, 12.8) | 12.7<br>(12.5, 13.0) | 12.5<br>(12.4, 12.7) | 12.5<br>(12.4, 12.7) | 12.4<br>(12.3, 12.5) | 12.4<br>(12.3, 12.5) | 12.4<br>(12.3, 12.5) | 12.6<br>(12.4, 12.8) | .001           | 0.01<br>(-0.23, 0.25)                                       |

|                                    | Survey-Weighted Mean<br>(95% CI) |                      |                      |                      |                      |                      |                      |                      |                      | P for<br>Trend | 2015-2016<br>versus<br>1999-2000,<br>Difference<br>(95% CI) |
|------------------------------------|----------------------------------|----------------------|----------------------|----------------------|----------------------|----------------------|----------------------|----------------------|----------------------|----------------|-------------------------------------------------------------|
| Estimated<br>Percent<br>Energy, %  | 1999-2000                        | 2001-2002            | 2003-2004            | 2005-2006            | 2007-2008            | 2009-2010            | 2011-2012            | 2013-2014            | 2015-2016            |                |                                                             |
| 1.30-3.49                          | 12.8<br>(12.6, 13.0)             | 12.7<br>(12.6, 12.8) | 13.0<br>(12.7, 13.2) | 12.8<br>(12.6, 13.0) | 12.8<br>(12.7, 13.0) | 12.6<br>(12.5, 12.8) | 12.7<br>(12.5, 12.9) | 12.8<br>(12.7, 12.9) | 13.1<br>(12.9, 13.2) | .01            | 0.22<br>(-0.02, 0.47)                                       |
| ≥3.50                              | 13.1<br>(12.9, 13.2)             | 13.0<br>(12.9, 13.2) | 13.3<br>(13.1, 13.5) | 13.2<br>(13.1, 13.4) | 13.1<br>(13.0, 13.3) | 13.0<br>(12.8, 13.1) | 12.9<br>(12.8, 13.0) | 13.0<br>(12.9, 13.2) | 13.4<br>(13.1, 13.7) | .004           | 0.32<br>(0.01, 0.62)                                        |
| P for interaction                  | .40                              |                      |                      |                      |                      |                      |                      |                      |                      |                |                                                             |
| <b>Polyunsaturated fatty acids</b> |                                  |                      |                      |                      |                      |                      |                      |                      |                      |                |                                                             |
| Age group, y                       |                                  |                      |                      |                      |                      |                      |                      |                      |                      |                |                                                             |
| 20-34                              | 7.38<br>(7.28, 7.48)             | 7.21<br>(7.14, 7.29) | 7.41<br>(7.33, 7.49) | 7.42<br>(7.30, 7.53) | 7.46<br>(7.36, 7.55) | 7.57<br>(7.50, 7.65) | 7.89<br>(7.83, 7.94) | 7.93<br>(7.83, 8.03) | 8.09<br>(8.01, 8.18) | <.001          | 0.71<br>(0.58, 0.84)                                        |
| 35-49                              | 7.61<br>(7.52, 7.71)             | 7.63<br>(7.54, 7.73) | 7.64<br>(7.51, 7.78) | 7.79<br>(7.66, 7.93) | 7.69<br>(7.60, 7.79) | 7.82<br>(7.71, 7.92) | 8.07<br>(7.93, 8.22) | 8.16<br>(8.08, 8.23) | 8.22<br>(8.08, 8.35) | <.001          | 0.60<br>(0.44, 0.77)                                        |
| 50-64                              | 7.75<br>(7.65, 7.85)             | 7.76<br>(7.69, 7.84) | 7.90<br>(7.74, 8.07) | 7.82<br>(7.74, 7.91) | 8.02<br>(7.93, 8.12) | 7.97<br>(7.89, 8.05) | 8.20<br>(8.08, 8.33) | 8.35<br>(8.25, 8.46) | 8.34<br>(8.20, 8.48) | <.001          | 0.59<br>(0.42, 0.76)                                        |
| ≥65                                | 7.66<br>(7.56, 7.77)             | 7.83<br>(7.77, 7.89) | 7.73<br>(7.61, 7.86) | 7.69<br>(7.58, 7.81) | 7.69<br>(7.56, 7.82) | 7.89<br>(7.80, 7.97) | 8.10<br>(7.97, 8.23) | 8.19<br>(8.06, 8.31) | 8.29<br>(8.18, 8.41) | <.001          | 0.63<br>(0.47, 0.79)                                        |
| P for interaction                  | <.001                            |                      |                      |                      |                      |                      |                      |                      |                      |                |                                                             |
| Sex                                |                                  |                      |                      |                      |                      |                      |                      |                      |                      |                |                                                             |
| Male                               | 7.53<br>(7.46, 7.60)             | 7.52<br>(7.47, 7.57) | 7.62<br>(7.53, 7.70) | 7.63<br>(7.52, 7.74) | 7.68<br>(7.61, 7.75) | 7.78<br>(7.71, 7.84) | 8.02<br>(7.96, 8.09) | 8.08<br>(7.98, 8.17) | 8.12<br>(8.04, 8.20) | <.001          | 0.59<br>(0.48, 0.69)                                        |
| Female                             | 7.63<br>(7.55, 7.70)             | 7.63<br>(7.56, 7.71) | 7.69<br>(7.59, 7.79) | 7.72<br>(7.60, 7.84) | 7.74<br>(7.69, 7.79) | 7.82<br>(7.75, 7.89) | 8.10<br>(8.00, 8.20) | 8.23<br>(8.15, 8.31) | 8.33<br>(8.22, 8.45) | <.001          | 0.71<br>(0.57, 0.84)                                        |
| P for interaction                  | .53                              |                      |                      |                      |                      |                      |                      |                      |                      |                |                                                             |
| Race/ethnicity                     |                                  |                      |                      |                      |                      |                      |                      |                      |                      |                |                                                             |
| Non-Hispanic<br>white              | 7.64<br>(7.58, 7.70)             | 7.63<br>(7.58, 7.67) | 7.72<br>(7.64, 7.80) | 7.76<br>(7.66, 7.85) | 7.77<br>(7.71, 7.83) | 7.89<br>(7.82, 7.96) | 8.13<br>(8.04, 8.21) | 8.26<br>(8.18, 8.34) | 8.33<br>(8.23, 8.43) | <.001          | 0.69<br>(0.57, 0.81)                                        |
| Non-Hispanic<br>black              | 7.51<br>(7.39, 7.63)             | 7.61<br>(7.51, 7.72) | 7.68<br>(7.56, 7.79) | 7.66<br>(7.54, 7.78) | 7.79<br>(7.70, 7.89) | 7.82<br>(7.76, 7.88) | 8.22<br>(8.15, 8.29) | 8.14<br>(8.02, 8.26) | 8.34<br>(8.23, 8.44) | <.001          | 0.82<br>(0.66, 0.99)                                        |

|                                                | Survey-Weighted Mean<br>(95% CI) |                      |                      |                      |                      |                      |                      |                      |                      | P for<br>Trend | 2015-2016<br>versus<br>1999-2000,<br>Difference<br>(95% CI) |
|------------------------------------------------|----------------------------------|----------------------|----------------------|----------------------|----------------------|----------------------|----------------------|----------------------|----------------------|----------------|-------------------------------------------------------------|
| Estimated<br>Percent<br>Energy, %              | 1999-2000                        | 2001-2002            | 2003-2004            | 2005-2006            | 2007-2008            | 2009-2010            | 2011-2012            | 2013-2014            | 2015-2016            |                |                                                             |
| Hispanic                                       | 7.42<br>(7.32, 7.52)             | 7.40<br>(7.26, 7.53) | 7.25<br>(7.15, 7.36) | 7.27<br>(7.12, 7.43) | 7.40<br>(7.30, 7.49) | 7.43<br>(7.33, 7.52) | 7.81<br>(7.72, 7.91) | 7.84<br>(7.72, 7.96) | 7.88<br>(7.75, 8.00) | <.001          | 0.46<br>(0.30, 0.62)                                        |
| Other                                          | 7.37<br>(7.07, 7.66)             | 7.21<br>(6.97, 7.45) | 7.52<br>(7.23, 7.81) | 7.45<br>(7.28, 7.62) | 7.56<br>(7.37, 7.75) | 7.57<br>(7.38, 7.76) | 7.75<br>(7.64, 7.86) | 7.91<br>(7.77, 8.04) | 8.00<br>(7.83, 8.16) | <.001          | 0.63<br>(0.30, 0.97)                                        |
| P for interaction                              | .02                              |                      |                      |                      |                      |                      |                      |                      |                      |                |                                                             |
| <b>Education level</b>                         |                                  |                      |                      |                      |                      |                      |                      |                      |                      |                |                                                             |
| <High school<br>graduate                       | 7.49<br>(7.40, 7.57)             | 7.53<br>(7.45, 7.61) | 7.40<br>(7.27, 7.54) | 7.44<br>(7.33, 7.55) | 7.56<br>(7.49, 7.63) | 7.59<br>(7.49, 7.69) | 7.93<br>(7.80, 8.06) | 7.92<br>(7.77, 8.07) | 7.78<br>(7.66, 7.89) | <.001          | 0.29<br>(0.15, 0.43)                                        |
| High school<br>graduate or GED                 | 7.60<br>(7.51, 7.68)             | 7.56<br>(7.47, 7.64) | 7.63<br>(7.49, 7.77) | 7.63<br>(7.48, 7.79) | 7.68<br>(7.62, 7.74) | 7.71<br>(7.62, 7.80) | 8.00<br>(7.90, 8.11) | 8.03<br>(7.93, 8.13) | 8.21<br>(8.12, 8.31) | <.001          | 0.62<br>(0.49, 0.74)                                        |
| Some college or<br>above                       | 7.62<br>(7.52, 7.71)             | 7.61<br>(7.53, 7.68) | 7.75<br>(7.63, 7.86) | 7.77<br>(7.68, 7.86) | 7.78<br>(7.72, 7.85) | 7.90<br>(7.85, 7.96) | 8.12<br>(8.03, 8.21) | 8.25<br>(8.14, 8.36) | 8.33<br>(8.24, 8.43) | <.001          | 0.71<br>(0.58, 0.85)                                        |
| P for interaction                              | <.001                            |                      |                      |                      |                      |                      |                      |                      |                      |                |                                                             |
| <b>Ratio of family income to poverty level</b> |                                  |                      |                      |                      |                      |                      |                      |                      |                      |                |                                                             |
| <1.30                                          | 7.49<br>(7.41, 7.56)             | 7.53<br>(7.41, 7.64) | 7.48<br>(7.34, 7.63) | 7.39<br>(7.29, 7.49) | 7.48<br>(7.40, 7.56) | 7.51<br>(7.46, 7.57) | 7.87<br>(7.80, 7.95) | 7.86<br>(7.74, 7.98) | 7.98<br>(7.86, 8.10) | <.001          | 0.49<br>(0.35, 0.63)                                        |
| 1.30-3.49                                      | 7.53<br>(7.42, 7.63)             | 7.53<br>(7.47, 7.59) | 7.65<br>(7.55, 7.75) | 7.51<br>(7.42, 7.61) | 7.67<br>(7.60, 7.74) | 7.74<br>(7.64, 7.84) | 8.08<br>(7.99, 8.16) | 8.17<br>(8.09, 8.25) | 8.20<br>(8.10, 8.29) | <.001          | 0.67<br>(0.53, 0.82)                                        |
| ≥3.50                                          | 7.68<br>(7.59, 7.77)             | 7.63<br>(7.54, 7.71) | 7.77<br>(7.64, 7.91) | 7.93<br>(7.83, 8.03) | 7.85<br>(7.75, 7.96) | 8.04<br>(7.94, 8.13) | 8.19<br>(8.10, 8.28) | 8.31<br>(8.21, 8.40) | 8.45<br>(8.28, 8.61) | <.001          | 0.76<br>(0.57, 0.95)                                        |
| P for interaction                              | <.001                            |                      |                      |                      |                      |                      |                      |                      |                      |                |                                                             |

Abbreviation: GED, general equivalency diploma; NHANES, National Health and Nutrition Examination Survey.

P for interaction was calculated with the survey-weighted Wald F test for an interaction term between 2-year survey cycle and demographic subgroups and statistical significance was set at a two-tailed P<.001.

**eTable 10. Trends in Estimated Healthy Eating Index-2015 by Age Group, Sex, Race/Ethnicity, Education, and Income, 1999-2016**

|                       | Survey-Weighted Mean<br>(95% CI) |                      |                      |                      |                      |                      |                      |                      |                      | P for<br>Trend | 2015-2016<br>versus<br>1999-2000,<br>Difference<br>(95% CI) |
|-----------------------|----------------------------------|----------------------|----------------------|----------------------|----------------------|----------------------|----------------------|----------------------|----------------------|----------------|-------------------------------------------------------------|
|                       | 1999-2000                        | 2001-2002            | 2003-2004            | 2005-2006            | 2007-2008            | 2009-2010            | 2011-2012            | 2013-2014            | 2015-2016            |                |                                                             |
| <b>Age group, y</b>   |                                  |                      |                      |                      |                      |                      |                      |                      |                      |                |                                                             |
| 20-34                 | 50.9<br>(49.8, 52.0)             | 51.8<br>(51.1, 52.6) | 51.1<br>(49.8, 52.3) | 52.5<br>(51.4, 53.5) | 52.8<br>(52.0, 53.7) | 53.6<br>(52.8, 54.5) | 54.3<br>(53.7, 54.9) | 53.5<br>(52.8, 54.2) | 54.5<br>(53.4, 55.6) | <.001          | 3.59<br>(2.07, 5.12)                                        |
| 35-49                 | 54.8<br>(53.9, 55.8)             | 55.0<br>(54.3, 55.6) | 54.2<br>(53.3, 55.1) | 55.4<br>(54.6, 56.3) | 55.1<br>(53.9, 56.2) | 56.5<br>(55.8, 57.3) | 56.9<br>(55.8, 58.0) | 56.9<br>(56.3, 57.6) | 56.6<br>(55.8, 57.4) | <.001          | 1.77<br>(0.57, 2.98)                                        |
| 50-64                 | 58.4<br>(57.3, 59.5)             | 58.8<br>(57.9, 59.6) | 57.7<br>(56.9, 58.5) | 58.4<br>(57.4, 59.4) | 59.8<br>(58.5, 61.0) | 59.8<br>(58.9, 60.6) | 60.1<br>(59.4, 60.8) | 59.6<br>(58.8, 60.4) | 59.1<br>(58.2, 60.0) | <.001          | 0.69<br>(-0.71, 2.09)                                       |
| ≥65                   | 62.0<br>(61.4, 62.6)             | 62.2<br>(61.5, 62.8) | 61.3<br>(60.8, 61.8) | 62.4<br>(61.8, 62.9) | 62.6<br>(61.7, 63.5) | 62.5<br>(61.9, 63.1) | 63.2<br>(62.2, 64.1) | 62.7<br>(61.9, 63.4) | 61.5<br>(60.6, 62.3) | .004           | -0.53<br>(-1.60, 0.54)                                      |
| P for interaction     |                                  |                      |                      |                      |                      |                      |                      |                      |                      |                | <.001                                                       |
| <b>Sex</b>            |                                  |                      |                      |                      |                      |                      |                      |                      |                      |                |                                                             |
| Male                  | 54.1<br>(53.3, 54.9)             | 54.6<br>(54.0, 55.1) | 53.9<br>(53.2, 54.5) | 54.7<br>(54.0, 55.4) | 55.2<br>(54.4, 56.0) | 55.7<br>(55.2, 56.3) | 56.5<br>(56.0, 56.9) | 55.9<br>(55.4, 56.4) | 56.0<br>(55.2, 56.8) | <.001          | 1.90<br>(0.80, 3.00)                                        |
| Female                | 57.1<br>(56.1, 58.2)             | 57.6<br>(57.0, 58.3) | 56.7<br>(55.8, 57.7) | 58.3<br>(57.6, 59.0) | 58.4<br>(57.4, 59.4) | 59.3<br>(58.9, 59.8) | 59.8<br>(59.0, 60.6) | 59.5<br>(59.0, 60.1) | 59.3<br>(58.2, 60.3) | <.001          | 2.13<br>(0.66, 3.59)                                        |
| P for interaction     |                                  |                      |                      |                      |                      |                      |                      |                      |                      |                | .44                                                         |
| <b>Race/ethnicity</b> |                                  |                      |                      |                      |                      |                      |                      |                      |                      |                |                                                             |
| Non-Hispanic<br>white | 55.2<br>(54.1, 56.3)             | 55.9<br>(55.3, 56.5) | 55.0<br>(54.2, 55.8) | 56.5<br>(55.9, 57.1) | 56.6<br>(55.4, 57.7) | 57.5<br>(57.0, 58.1) | 58.0<br>(57.3, 58.7) | 57.5<br>(56.8, 58.1) | 57.4<br>(56.5, 58.3) | <.001          | 2.20<br>(0.79, 3.61)                                        |
| Non-Hispanic<br>black | 55.1<br>(54.2, 56.1)             | 55.3<br>(54.5, 56.2) | 54.4<br>(53.6, 55.3) | 55.4<br>(54.0, 56.8) | 55.8<br>(55.3, 56.2) | 56.0<br>(55.0, 56.9) | 56.6<br>(55.3, 57.9) | 56.6<br>(55.8, 57.3) | 56.2<br>(55.1, 57.3) | .02            | 1.09<br>(-0.34, 2.52)                                       |
| Hispanic              | 57.6<br>(56.6, 58.5)             | 57.2<br>(56.6, 57.7) | 57.1<br>(56.0, 58.2) | 57.3<br>(56.4, 58.1) | 58.0<br>(57.5, 58.5) | 57.9<br>(57.3, 58.5) | 58.4<br>(57.7, 59.1) | 58.3<br>(57.4, 59.3) | 57.8<br>(57.0, 58.7) | .12            | 0.23<br>(-1.04, 1.50)                                       |
| Other                 | 58.4<br>(56.4, 60.4)             | 59.4<br>(57.5, 61.2) | 58.7<br>(57.0, 60.5) | 58.9<br>(57.8, 60.0) | 61.0<br>(59.8, 62.3) | 60.3<br>(59.1, 61.5) | 61.6<br>(60.7, 62.6) | 61.0<br>(59.6, 62.4) | 61.2<br>(60.1, 62.3) | .002           | 2.83<br>(0.56, 5.10)                                        |
| P for interaction     |                                  |                      |                      |                      |                      |                      |                      |                      |                      |                | .07                                                         |

|                                                | Survey-Weighted Mean<br>(95% CI) |                      |                      |                      |                      |                      |                      |                      |                      | P for<br>Trend | 2015-2016<br>versus<br>1999-2000,<br>Difference<br>(95% CI) |
|------------------------------------------------|----------------------------------|----------------------|----------------------|----------------------|----------------------|----------------------|----------------------|----------------------|----------------------|----------------|-------------------------------------------------------------|
|                                                | 1999-2000                        | 2001-2002            | 2003-2004            | 2005-2006            | 2007-2008            | 2009-2010            | 2011-2012            | 2013-2014            | 2015-2016            |                |                                                             |
| <b>Education level</b>                         |                                  |                      |                      |                      |                      |                      |                      |                      |                      |                |                                                             |
| <High school graduate                          | 56.2<br>(55.4, 57.0)             | 55.8<br>(54.8, 56.8) | 55.6<br>(54.7, 56.4) | 56.5<br>(55.4, 57.5) | 56.1<br>(55.0, 57.2) | 56.8<br>(56.0, 57.6) | 57.0<br>(56.1, 57.9) | 56.5<br>(55.5, 57.4) | 56.6<br>(55.6, 57.6) | .34            | 0.37<br>(-0.89, 1.63)                                       |
| High school graduate or GED                    | 54.8<br>(53.8, 55.8)             | 55.0<br>(54.2, 55.8) | 53.7<br>(52.8, 54.6) | 55.0<br>(54.3, 55.8) | 55.7<br>(54.7, 56.7) | 55.4<br>(54.5, 56.3) | 57.1<br>(56.4, 57.9) | 55.6<br>(54.7, 56.4) | 55.8<br>(55.0, 56.6) |                | <.001                                                       |
| Some college or above                          | 55.9<br>(54.8, 57.0)             | 56.8<br>(56.3, 57.3) | 56.1<br>(55.4, 56.8) | 57.3<br>(56.7, 58.0) | 57.8<br>(56.8, 58.7) | 58.7<br>(58.3, 59.1) | 58.8<br>(58.1, 59.5) | 58.9<br>(58.3, 59.4) | 58.6<br>(57.7, 59.4) | <.001          | 2.61<br>(1.24, 3.97)                                        |
| P for interaction                              |                                  |                      |                      |                      |                      |                      |                      |                      |                      |                | .003                                                        |
| <b>Ratio of family income to poverty level</b> |                                  |                      |                      |                      |                      |                      |                      |                      |                      |                |                                                             |
| <1.30                                          | 55.4<br>(54.3, 56.5)             | 55.0<br>(54.0, 55.9) | 53.9<br>(52.5, 55.2) | 55.7<br>(54.7, 56.7) | 55.3<br>(54.0, 56.6) | 55.6<br>(55.0, 56.1) | 56.0<br>(55.0, 56.9) | 55.7<br>(55.0, 56.4) | 56.2<br>(55.3, 57.2) | .24            | 0.81<br>(-0.63, 2.26)                                       |
| 1.30-3.49                                      | 55.1<br>(54.2, 55.9)             | 55.7<br>(55.1, 56.4) | 55.6<br>(54.5, 56.6) | 55.9<br>(55.2, 56.6) | 56.8<br>(55.8, 57.7) | 57.1<br>(56.4, 57.8) | 57.7<br>(57.0, 58.4) | 57.2<br>(56.6, 57.8) | 56.4<br>(55.6, 57.1) |                | <.001                                                       |
| ≥3.50                                          | 56.1<br>(54.9, 57.2)             | 56.9<br>(56.2, 57.6) | 56.0<br>(55.3, 56.6) | 57.4<br>(56.4, 58.3) | 57.5<br>(56.5, 58.4) | 58.8<br>(58.1, 59.5) | 59.9<br>(58.9, 60.8) | 59.5<br>(58.8, 60.2) | 59.3<br>(58.3, 60.3) | <.001          | 3.23<br>(1.71, 4.75)                                        |
| P for interaction                              |                                  |                      |                      |                      |                      |                      |                      |                      |                      |                | <.001                                                       |

Abbreviation: GED, general equivalency diploma; NHANES, National Health and Nutrition Examination Survey.

P for interaction was calculated with the survey-weighted Wald F test for an interaction term between 2-year survey cycle and demographic subgroups and statistical significance was set at a two-tailed  $P < .001$ .

## eReferences

1. Pasiakos SM, Agarwal S, Lieberman HR, Fulgoni VL, 3rd. Sources and amounts of animal, dairy, and plant protein intake of us adults in 2007-2010. *Nutrients*. 2015;7(8):7058-7069. doi: 10.3390/nu7085322.
2. Bowman SA CJ, Friday JE, Lynch KL, and Moshfegh AJ. . Food patterns equivalents database 2013-14: Methodology and user guide [online]. Food surveys research group, beltsville human nutrition research center, agricultural research service, u.S. Department of agriculture, beltsville, maryland. 2017. <http://www.ars.usda.gov/nea/bhnrc/fsrg>.
3. Bowman sa, friday je, moshfegh a. (2008). Mypyramid equivalents database, 2.0 for usda survey foods, 2003-2004 [online] food surveys research group. Beltsville human nutrition research center, agricultural research service, u.S. Department of agriculture, beltsville, md. Available at: <Http://www.Ars.Usga.Gov/ba/bhnrc/fsrg>
4. Blanton CA, Moshfegh AJ, Baer DJ, Kretsch MJ. The usda automated multiple-pass method accurately estimates group total energy and nutrient intake. *J Nutr*. 2006;136(10):2594-2599. doi: 10.1093/jn/136.10.2594.
5. Tooze JA, Midthune D, Dodd KW, et al. A new statistical method for estimating the usual intake of episodically consumed foods with application to their distribution. *J Am Diet Assoc*. 2006;106(10):1575-1587. doi: 10.1016/j.jada.2006.07.003.
